# Supplementary material
Source: PubMed Central journal article supplement (PMC6293874)
Supplement: blood831982-suppl1.pdf [file blood831982-suppl1.pdf]

## Supplementary file

### **A Synthesis Approach of Mouse Studies to Identify Genes and Proteins in Arterial Thrombosis and Bleeding**

Constance C. F. M. J. Baaten\*, Stuart Meacham\*, Susanne M. de Witt\*, Marion A. H. Feijge, David J. Adams, Jan-Willem N. Akkerman, Judith M. E. M. Cosemans, Luigi Grassi, Steve Jupe, Myrto Kostadima, Nadine J. A. Mattheij, Martin H. Prins, Ramiro Ramirez-Solis, Oliver Soehnlein, Frauke Swieringa, Christian Weber, Jacqueline K. White, Willem H. Ouweland\*, Johan W. M. Heemskerk\*

## Supplementary methods

### **Selection of papers and study definition**

A PubMed search over the years 1980-2018 was performed to identify papers on mouse studies and arterial thrombus formation. Search keywords were mouse, arterial, thrombus and thromboembolism in different combinations (Suppl. Table 1). We searched for primary papers: *(i)* in English language; *(ii)* describing effects of modification of a specific mouse gene or protein on arterial thrombus formation or thromboembolism; and *(iii)* providing quantitative data with statistics. Excluded were papers: *(i)* not indicating a well-defined genetic or pharmacological perturbation; *(ii)* using venous thrombosis models only; *(iii)* or containing no quantitative data or statistics. A second PubMed search was performed to identify papers describing quantitative effects of genetic modification on tail bleeding time. Keywords were: mouse, (tail) bleeding, and tail clipping in different combinations. Non-tail bleeding times were not included. Papers of the described sets as well as published reviews were further

screened for additional primary papers. For numbers of papers identified per search term combination, see Suppl. Table 1.

From the included papers, individual studies were defined as measurements in a defined mouse cohort of thrombus formation or thromboembolism *in vivo* or *in vitro*, using a particular experimental method (vascular bed, injury trigger) and a particular animal perturbation (modified gene or target protein inhibited) in comparison to the unperturbed condition (corresponding wildtype or pharmacological control), such as defined by the authors. Papers describing multiple models to measure thrombus formation, e.g., in different vessels or *in vivo* and *in vitro*, hence, provided more than one study.

### **Registry of perturbed genes, experimental variables and outcome data per study**

In Data File 1, all studies including references were categorized per target gene or corresponding protein, according to Mouse Genome Informatics (MGI). Basal genetic information was taken from open access databases ([www.uniprot.org](http://www.uniprot.org) and [www.informatics.jax.org](http://www.informatics.jax.org)): *i.e.* gene symbols and names; mouse genome index; chromosome location; Uniprot identification number. Per study are listed, according to the original papers: the genetic background; type of genetic modification; pharmacological intervention if applicable; mouse phenotype regarding altered activity of platelets, coagulation, fibrinolysis or vessel wall.

As indicated in Data File 1, the collected experimental details on the prothrombotic intervention differ per study class. Registered for class I (arterial thrombosis *in vivo*) are: vessel and type of injury, and dosing plus duration of the injury.



Recorded for class II (systemic thromboembolism *in vivo*) were: type and dosing of the intervention. Recorded for class III (thrombus formation *in vitro*) are: thrombogenic surface, and the blood flow conditions. With respect to tail bleeding (class IV), only times of (continued) bleeding are listed.

Quantitative information regarding the thrombotic or thromboembolic process is recorded at both the perturbed (genetic modification or pharmacological intervention) and unperturbed (wildtype or control) conditions (Data File 1). Original papers were mined for the following data (in units, numbers and means/medians, as published by the authors): For **Class I**: blood flow (BF); time to thrombus formation (TTF), time to occlusion (TO), percentage of occluded vessels (%Oc), platelet adhesion (PA), thrombus volume or size (ThS), number of thrombi (#Th), number of emboli (#Emb). For **Class II**: percentage of deaths (%Dth), time to death (TDth), platelet count (PIC). For **Class III**: time to thrombus formation (TTF), percentage surface area coverage (SAC); platelet adhesion (PA), procoagulant activity (ProA), thrombus size (ThS), number of thrombi or platelet aggregates (#Th), number of emboli (#Emb). For **Class IV**: per default tail bleeding time (TBT); if indicated re-bleeding events (RB).

Also listed are the experimental variables, such as type of measurement, detection method, and analysis procedure. Differences in mean or median values between mice with(out) perturbation were considered to be statistically significant, if indicated so by the authors.

## **Meta-analysis**

Conventional meta-analysis was performed for six of the best studied genes, *i.e.*, *Cd36*, *Clec1b*, *F12*, *Fcer1g*, *Gp6* and *Vwf* (Data File 2). For meta-analysis those studies were included in which: (i) arterial thrombosis was studied in the carotid, mesenteric or femoral vascular beds triggered by FeCl<sub>3</sub>; (ii) outcomes were presented as time to vascular occlusion or time to (full) thrombus formation; (iii) data were presented as means with SE or SD (if *n* was given as a range, lowest values were taken); (iv) equal variance of groups was assumed with a correction based on effect size, if the SD of one group was missing. The meta-analyses were applied assuming a random effects model, based on the DerSimonian and Laird's methodology, according to the Nordic Cochrane Group Review Manager 5.1.<sup>1,2</sup> Calculated per gene were: standardized mean difference plus 95% confidence interval, and heterogeneity index I<sup>2</sup>. Full meta-analysis data are given in Data File 2.

## **Combining of studies and outcome parameters for synthesis approach**

Studies of class I (arterial thrombosis *in vivo*) were grouped according to similarity in the protocol of thrombosis induction (Suppl. Table 2). For class I, groups 1-12 differed in type of vascular bed and trigger of thrombosis induction. The severity of intervention (dosing and duration) was not evaluated separately, since this is often incompletely described.<sup>3</sup> For class II, groups 20-23 were formed based on trigger of (provoked) systemic thromboembolism or on observation of unprovoked thromboembolism. For class III, groups 30-34 differed depending on the thrombogenic surface for *in vitro* blood flow measurement. Studies of class IV (bleeding) were not sub-divided.

Regarding *in vivo* and *in vitro* thrombus formation (classes I and III), data were registered as time-dependent parameters (**a**), mass-dependent parameters (**b***i*: extent of platelet adhesion; **b***ii*: extent of occlusion or surface-area-coverage; **b***iii*: number, size or volume of thrombi), or stability parameters (**c**, number or frequency of embolic events). Regarding *in vivo* thromboembolism (class II), data were categorized as provoked (**d**, percentage of survival, time to death, residual platelet count) or unprovoked (**e**, spontaneous thrombosis or bleeding).

### **Scaling comparison of thrombosis studies in synthesis approach**

Per study and parameter, original papers were mined for the published quantitative data on (sub)parameters of arterial thrombus formation, thromboembolism or thrombus formation *in vitro*, which were in accordance with the authors' conclusions. The reported effects of the perturbation (genetic modification or pharmacological intervention) were linearly normalized on both a 3-point and 5-point scale. For the 3-point scale, reported values indicating a *significant reduction or delay* in thrombus formation or thromboembolism after perturbation were scaled as -1; no effects as 0; and values indicating a *significant increase or acceleration* of thrombus formation as +1. For the 5-point scale, a further distinction was made between significantly reduced/delayed thrombus formation of < 50% (scale -2) or  $\geq$  50% (scale -1); and between an increased/accelerated thrombus formation of  $\leq$  200% (scale +1) or > 200% (scale +2). Perturbation effects were considered to be statistically significant, if indicated so by the authors. For convenience, these normalized, scaled values are indicated below as 'scores'. A complete overview of the mined data and the processing of the data are

provided in Data File 1. In addition, the legend part of this file gives examples of the way of data processing towards scores.

To assess effects on hemostasis, tail bleeding times were also normalized on 3-point and 5-point scale: For the 3-point scale, bleeding was scored as prolonged (-1), unchanged (0), or shortened (+1). For the 5-point scale, bleeding scores were further subdivided into significantly prolonged bleeding times of  $< 50\%$  (scale -2) or  $\geq 50\%$  (scale -1); and between significantly shortened bleeding times of  $\leq 200\%$  (scale +1) or  $> 200\%$  (scale +2). Again, effects were considered to be statistically significant, if indicated so by the authors. Given that the majority of mouse studies were carried out at similar, small sample size ( $n = 6-12$  animals), no weighting was performed when averaging study scores.

Mean scores per study and gene were rounded off on both 3-point and 5-point scales. Data File 1 provides all scores per study and gene, as well as the rounded off values both on 3-point and 5-point scales. As an overview, the mean scores per gene for modification in arterial thrombus formation (classes I-III) and tail bleeding (class IV) are listed in Data File 3, which also includes a shortlist of reported functions of the corresponding proteins in platelet, coagulant or vascular activity, such as described in the original papers.

### **Reactome pathway analysis**

Reactome ([www.reactome.org/](http://www.reactome.org/)) is an open source database for the exploration and analysis of (human) biological pathways, based on curated literature analysis. It comprises a listing of protein-protein interactions based on biochemical reactions that

are mediated by specific proteins or classes of proteins (e.g., protein tyrosine kinases or GTP-binding proteins). Using the Analyze Data tool,<sup>4</sup> Reactome also clusters cascades of protein-protein interactions into biological pathways. In addition, it performs overrepresentation analysis of protein lists to determine the coverage of matches per pathway; and allows the inclusion of attributes (*i.c.* scores) to produce a mean value of the attribute per pathway (*i.c.* mean scores).

Reactome analysis was performed for the following datasets: (i) all 409 scored mouse genes; (ii) all 334 genes or (iii) the 278 genes with modifying scores for thrombus formation (class I-III); (iv) all 311 genes or (v) the 192 genes with modifying scores for bleeding (class IV). Scored genes were submitted as Uniprot numbers for the orthologues human proteins.

For each of the five datasets, numbers of entities in Reactome were listed per biological pathway, as well as the mean scores of the involved proteins per pathway. Pathway lists were restricted to a minimal number of 4 entities for dataset (i). For this dataset, also *P* values were given regarding the overrepresentation of the Uniprot lists in the concerning pathways (Data File 5).

Pathway analysis for the complete dataset of 409 scored genes/proteins indicated that a substantial part of the Reactome-registered hemostatic system was covered (148 out of 806 proteins). Well-covered pathways included '*Platelet activation, signaling and aggregation*' (93/288), '*Neutrophil degranulation*' (44/480), '*Platelet degranulation*' (32/137), '*Formation of fibrin clot*' (28/52), and various cell-signaling pathways, all of which with high significance of over-representation. Reactome analysis also revealed over-representation in several unexpected pathways, linked to cancer

(e.g., '*Oncogenic MAPK signaling*' 18/87; '*Signaling by BRAF and RAF fusions*' 17/68) or to the vessel wall (e.g., '*ECM proteoglycans*' 9/79, '*Nitric oxide stimulates guanylate cyclase*' 7/36).

The Reactome Analysis tool also allows calculation of the mean scores per pathway of identified proteins/genes. This analysis revealed several pathways, where the mean scores for (modifying) proteins in class I-III were less negative than for those in class IV (*i.e.*, '*Synthesis of 12/15-eicosatetraenoic acid derivatives*', '*Activation of matrix metalloproteinases*', '*Common pathway of fibrin clot formation*'), suggesting a more prominent role in hemostasis. Conversely, mean scores for proteins in Toll-like receptor pathways ('*IRAK4 deficiency TLR2/4*' and '*MyD88 deficiency TLR2/4*') in class I-III were more negative than for those in class IV, suggesting a more prominent role in thrombosis. (Data File 5)

### **Network of protein interactions in thrombosis and hemostasis (PITH)**

For network analysis in Cytoscape, human orthologous genes were identified for 397 murine genes, of which 267 were included as modifying in class I-III. For these genes, corresponding human Uniprot protein identifiers were obtained, and used as primary bait to search for first order interactions using the public databases Reactome (78%), IntAct (22%) ([www.ebi.ac.uk/intact/](http://www.ebi.ac.uk/intact/)) and knowledge obtained from the literature (0.02%). Networks were constructed in Cytoscape, and network structures were analyzed using the CentiScape tool.<sup>5</sup>

Lists of core nodes (baits) and novel nodes (interactors) of all human orthologues in the network are provided in Data File 6. Indicated are for the core nodes the mean

scores of mouse genes in class I-III (thrombosis) and class IV (bleeding). Indicated are for all nodes the following network parameters: (i) Numbers of direct edges; (ii) Connectivity ('NeighborhoodConnectivity', *i.e.* steps to reach all other nodes); (iii) Proximity ('Radiality', *i.e.* average tendency to proximity to other nodes); (iv) Closeness ('ClosenessCentrality', *i.e.* central location to all other nodes); (v) Sub-clustering ('ClusteringCoefficient', *i.e.* tendency to organization in discrete clusters).

Indicated in Data File 6 are genes/proteins derived from the following GWAS and human (patho)physiological databases: (i) Thrombogenomics platform of genes linked to rare human Mendelian disorders of platelet or coagulation function from the BPD cohort (Bleeding and Platelet Diseases, NHS, UK);<sup>6</sup> (ii) GWAS of platelet count and volume<sup>7</sup>; (iii) variants of genomic sites associated with quantitative platelet traits;<sup>8</sup> (iv) genetic loci of the MEGASTROKE GWAS associated with stroke subtypes,<sup>9</sup> and (v) genetic loci associated with coronary artery disease.<sup>10</sup>

Furthermore, for relevant nodes, gene expression levels are indicated from the published Blueprint database,<sup>11</sup> such as recently updated regarding lineages of hematopoietic stem cells, including megakaryocytes (platelet precursor cells) and erythroblasts.<sup>12</sup>

### **mRNA Expression analysis**

mRNA expression analysis of indicated endothelial and blood cells was as described. In brief, Trim Galore (v0.3.7) ([http://www.bioinformatics.babraham.ac.uk/projects/trim\\_galore/](http://www.bioinformatics.babraham.ac.uk/projects/trim_galore/)) with parameters “-q 15 -s 3 --length 30 -e 0.05” was used to trim PCR and sequencing adapters. Trimmed reads were aligned to the Ensembl v75<sup>13</sup> human

transcriptome with Bowtie 1.0.1<sup>14</sup> using the parameters “-a --best --strata -S -m 100 -X 500 --chunkmbs 256 --nofw --fr”. Subsequently, MMSEQ (v1.0.8a)<sup>15,16</sup> was used with default parameters to quantify and normalize gene expression.

### **Genetically modified mice to confirm constructed network**

Animal experiments were approved by the local Animal Experimental Committees in Munich and Hinxton/Cambridge. Five strains of mice came from an unbiased selection of animals available from the Wellcome Sanger Institute Mouse Genetics Programme (Cambridge, United Kingdom), generated using targeted embryonic stem cells from the European Conditional Mouse Mutagenesis (EUCOMM) program or the Knockout Mouse Project (KOMP);<sup>17</sup> *i.e.* mice with homozygous deficiency in *Bnip2*, *Dlg4*, *Grm8*, *Ifnar1* or *Vps13a* with corresponding wildtype controls (tm1a/b allele on a C57BL/6N genetic background).

Three strains came from the breeding programme of the Institute for Cardiovascular Prevention in Munich (Germany) and were included because of established roles in atherosclerosis,<sup>18,19</sup> *i.e.* C57BL/6 mice with homozygous deficiency in *Anxa1*, *ApoE* or *Fpr2* with corresponding wildtypes.<sup>20</sup> Mice from all strains had normal platelet counts; however, platelets from only *Ifnar1*-deficient mice showed a 9.4% reduction in mean volume ( $P < 0.01$ ,  $n = 5$ ). No other relevant information on blood phenotype was available from Mouse Genome Informatics ([www.informatics.jax.org](http://www.informatics.jax.org)).

Flow perfusion tests with 350  $\mu\text{L}$  whole blood samples (collected on thrombin inhibitors) were performed as before.<sup>21</sup> In brief, freshly obtained samples were perfused over microspots coated with collagen type I at a wall shear rate of  $1000 \text{ s}^{-1}$  during 4 min



through a parallel-plate perfusion chamber. Brightfield microscopic images were taken using an EVOS microscope,<sup>22</sup> and analyzed for surface area coverage of multilayered platelet thrombi using the free program ImageJ.<sup>21,23</sup> All image analysis was blinded for the experimental condition.

### **Statistics and comparative analyses**

Statistics on effects of gene perturbation on thrombus formation in individual studies were taken from the original papers. For all studies, correlation analysis was performed to compare, per study and class, scores of time-dependent, mass-dependent and thrombus stability parameters. A non-parametric Kendall's Tau-c test was used to determine association or rank correlation. Herein, the Kendall's  $\tau$  value is computed as the excess of tabled concordant over discordant pairs, divided by a term representing the geometric mean of untied pairs. It reaches from 0.0 to 1.0 for tables where the entries are on one diagonal.

### **Calculation of consistency parameter (CP)**

A standard method to assess distribution profiles of interval variables does not exist. We therefore defined a procedure to come to such a parameter. First, for all modifying genes (mean scores -2, -1, +1, +2) with  $n \geq 2$ , a one-sample t-test was performed for the scores of all individual studies in classes I-III. The obtained  $P$  value was used to calculate a consistency parameter (CP), defined as  $1 - \log(P)$ , reflecting the extent of cohesion of pooled study scores (with 95% confidence intervals). If all studies scores were equal, the nearest  $P$  value was assigned. For genes with  $n = 1$  studies, CP was

set at 1 per default. For non-modifying genes (mean score of 0, SD=0), the null hypothesis was considered to be true, and a  $P = 1.00$  was assumed. Note that a CP value  $>2.30$  corresponds to a  $P < 0.05$ , and to 95% CI values not including zero. The statistical package for the social sciences was used for all analyses (SPSS version 23, IBM Statistics).

## References

1. The Cochrane Collaboration. The Nordic Cochrane Centre Review Manager. *RevMan*. 2011;5.1.
2. McKenzie JE, Salanti G, Lewis SC, Altman DG. Meta-analysis and the Cochrane collaboration: 20 years of the Cochrane statistical methods group. *Systematic Rev*. 2013;2:80.
3. Denis CV, Dubois C, Brass LF, Heemskerk JW, Lenting PJ. Towards standardization of in vivo thrombosis studies in mice. *J Thromb Haemost*. 2011;9:1641-4.
4. Croft D, Mundo AF, Haw R, Milacic M, Weiser J, Wu G, et al. The Reactome pathway knowledgebase. *Nucleic Acids Res*. 2014;42:D472-7.
5. Scardoni G, Petterlini M, Laudanna C. Analyzing biological network parameters with CentiScaPe. *Bioinformatics*. 2009;25:2857-9.
6. Thrombogenomics. <https://haemgenhaemcamacuk/thrombogenomics>. 2018.
7. Gieger C, Radhakrishnan A, Cvejic A, Tang W, Porcu E, et al. New gene functions in megakaryopoiesis and platelet formation. *Nature*. 2011;480:201-8.
8. Petersen R, Lambourne JJ, Javierre BM, Grassi L, Kreuzhuber R, Ruklisa D, et al. Platelet function is modified by common sequence variation in megakaryocyte super enhancer. *Nat Commun*. 2017;8:16058.
9. Malik R, Chauhan G, Traylor M, Sargurupremraj M, Okada Y, Mishra A, et al. Multiancestry genome-wide association study of 520,000 subjects identifies 32 loci associated with stroke and stroke subtypes. *Nat Genet*. 2018;50:524-37.

10. Van der Harst P, Verweij N. Identification of 64 novel genetic loci provides an expanded view on the genetic architecture of coronary artery disease. *Circ Res*. 2018;122:433-43.
11. Chen L, Kostadima M, Martens JH, Canu G, Garcia SP, Turro E, et al. Transcriptional diversity during lineage commitment of human blood progenitors. *Science*. 2014;345:125-33.
12. Blueprint. *blueprinthaemcamacuk/bloodatlas/*. 2018.
13. Cunningham F, Amode MR, Barrell D, Beal K, Billis K, Brent S, et al. Ensembl 2015. *Nucleic Acids Res*. 2015;43:D662-9.
14. Langmead B, Trapnell C, Pop M, Salzberg SL. Ultrafast and memory-efficient alignment of short DNA sequences to the human genome. *Genome Biol*. 2009;10:R25.
15. Turro E, Astle WJ, Tavaré S. Flexible analysis of RNA-seq data using mixed effects models. *Bioinformatics*. 2014;30:180-8.
16. Turro E, Su SY, Gonçalves A, Coin LJ, Richardson S, Lewin A. Haplotype and isoform specific expression estimation using multi-mapping RNA-seq reads. *Genome Biol*. 2011;12:R13.
17. Skarnes WC, Rosen B, West AP, Koutsourakis M, Bushell W, Iyer V, et al. A conditional knockout resource for the genome-wide study of mouse gene function. *Nature*. 2011;474:337-42.
18. Koenen RR, von Hundelshausen P, Nesmelova IV, Zerneck A, Liehn EA, Sarabi A, et al. Disrupting functional interactions between platelet chemokines inhibits atherosclerosis in hyperlipidemic mice. *Nat Med*. 2009;15:97-103.
19. Weber C, Soehnlein O. ApoE controls the interface linking lipids and inflammation in atherosclerosis. *J Clin Invest*. 2011;121:3825-7.
20. Drechsler M, de Jong R, Rossaint J, Viola JR, Leoni G, Wang JM, et al. Annexin A1 counteracts chemokine-induced arterial myeloid cell recruitment. *Circ Res* 2015;116:827-35.
21. Kuijpers MJ, Mattheij NJ, Cipolla L, van Geffen JP, Lawrence T, Donners MM, et al. Platelet CD40L modulates thrombus growth via phosphatidylinositol 3-kinase beta,

and not via CD40 and I $\kappa$ B kinase alpha. *Arterioscler Thromb Vasc Biol.* 2015;35:1374-81.

22. De Witt SM, Swieringa F, Cavill R, Lamers MM, van Kruchten R, Mastenbroek T, et al. Identification of platelet function defects by multi-parameter assessment of thrombus formation. *Nat Commun.* 2014;5:4257.
23. Schindelin J, Arganda-Carreras I, Frise E, Kaynig V, Longair M, Pietzsch T, et al. Fiji: an open source platform for biological-image analysis. *Nat Methods.* 2012;9:676-82.

## List of Supplementary Figures, Tables and Data Files

**Suppl. Figure 1:** Numbers of studies in class I-III with main experimental variables.

**Suppl. Figure 2:** Overview per mouse gene and study of scores in class I, II, III and IV.

**Suppl. Figure 3:** Network of protein interactions in thrombosis and hemostasis (PITH).

**Suppl. Figure 4:** Buildup of protein-protein interaction network.

**Suppl. Figure 5:** Relative expression levels of core and novel nodes in blood cells

**Suppl. Table 1:** Keywords and numbers from search outcomes in PubMed.

**Suppl. Table 2:** Classification and grouping of analyzed mouse studies.

**Suppl. Table 3:** Correlations of intra-study parameters scored on 3- or 5-point scale.

**Suppl. Table 4:** Correlations of mean study scores per class on 3- or 5-point scale.

**Suppl. Table 5:** Numbers of scored mouse genes per class and group.

**Suppl. Table 6:** Node connections in PITH network for most connected proteins.

**Suppl. Table 7:** Mouse/human homology of relevant orthologous genes and proteins.

## Supplementary Data File

**Legend.** Includes examples of scoring/scaling procedure.

**Data File 1.** Primary dataset of included mouse studies, genetic modification, experimental variables, mined measurement outcomes, (sub)scores and references.

**Data File 2.** Input data of formal meta-analysis using RevMan 5.1 for six most studied genes.

**Summary Data File 3.** Mean scores and consistency parameter (CP) of alterations in arterial thrombus formation (classes I-III) and tail bleeding (class IV) calculated per gene.

**Data File 4.** Mouse/human homology, mRNA and protein expression levels. Listings for all genes included in the synthesis.

**Data File 5.** Reactome pathway analysis of over-representation for scored genes/proteins with(out) modifying effect in class I-III (thrombosis) or class IV (hemostasis).

**Data File 6.** Core and novel proteins (nodes) identified in protein interaction network of thrombosis and hemostasis (PITH).

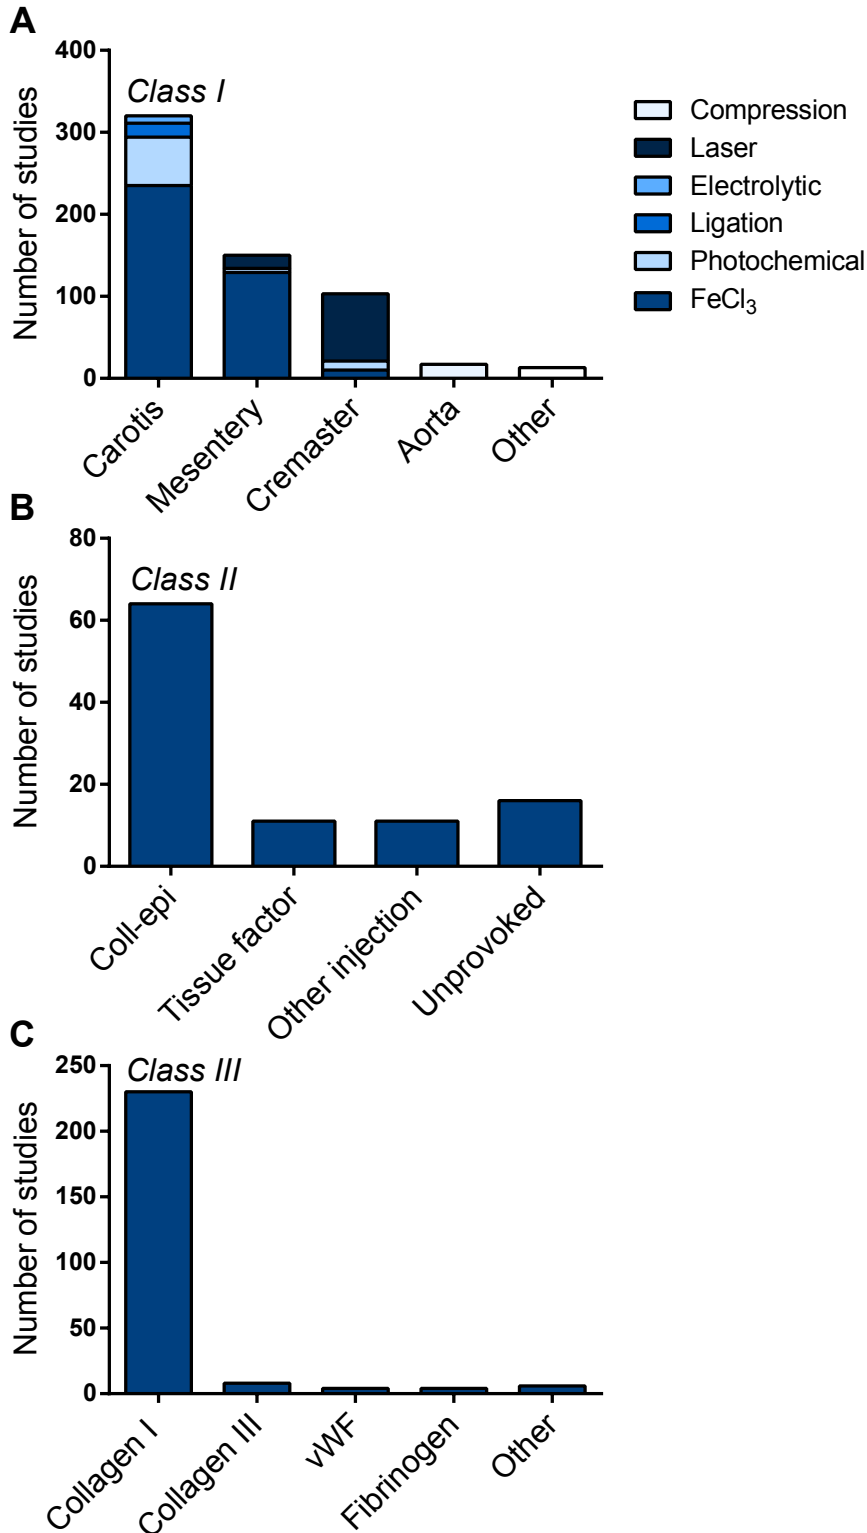

**Suppl. Figure 1. Numbers of studies analyzed in classes I-III with main experimental variables. A,** Class I studies grouped with separation according to vascular bed or type of injury. **B,** Class II studies grouped with separation according to type of systemic intervention. **C,** Class III studies with separation for type of thrombogenic surface.

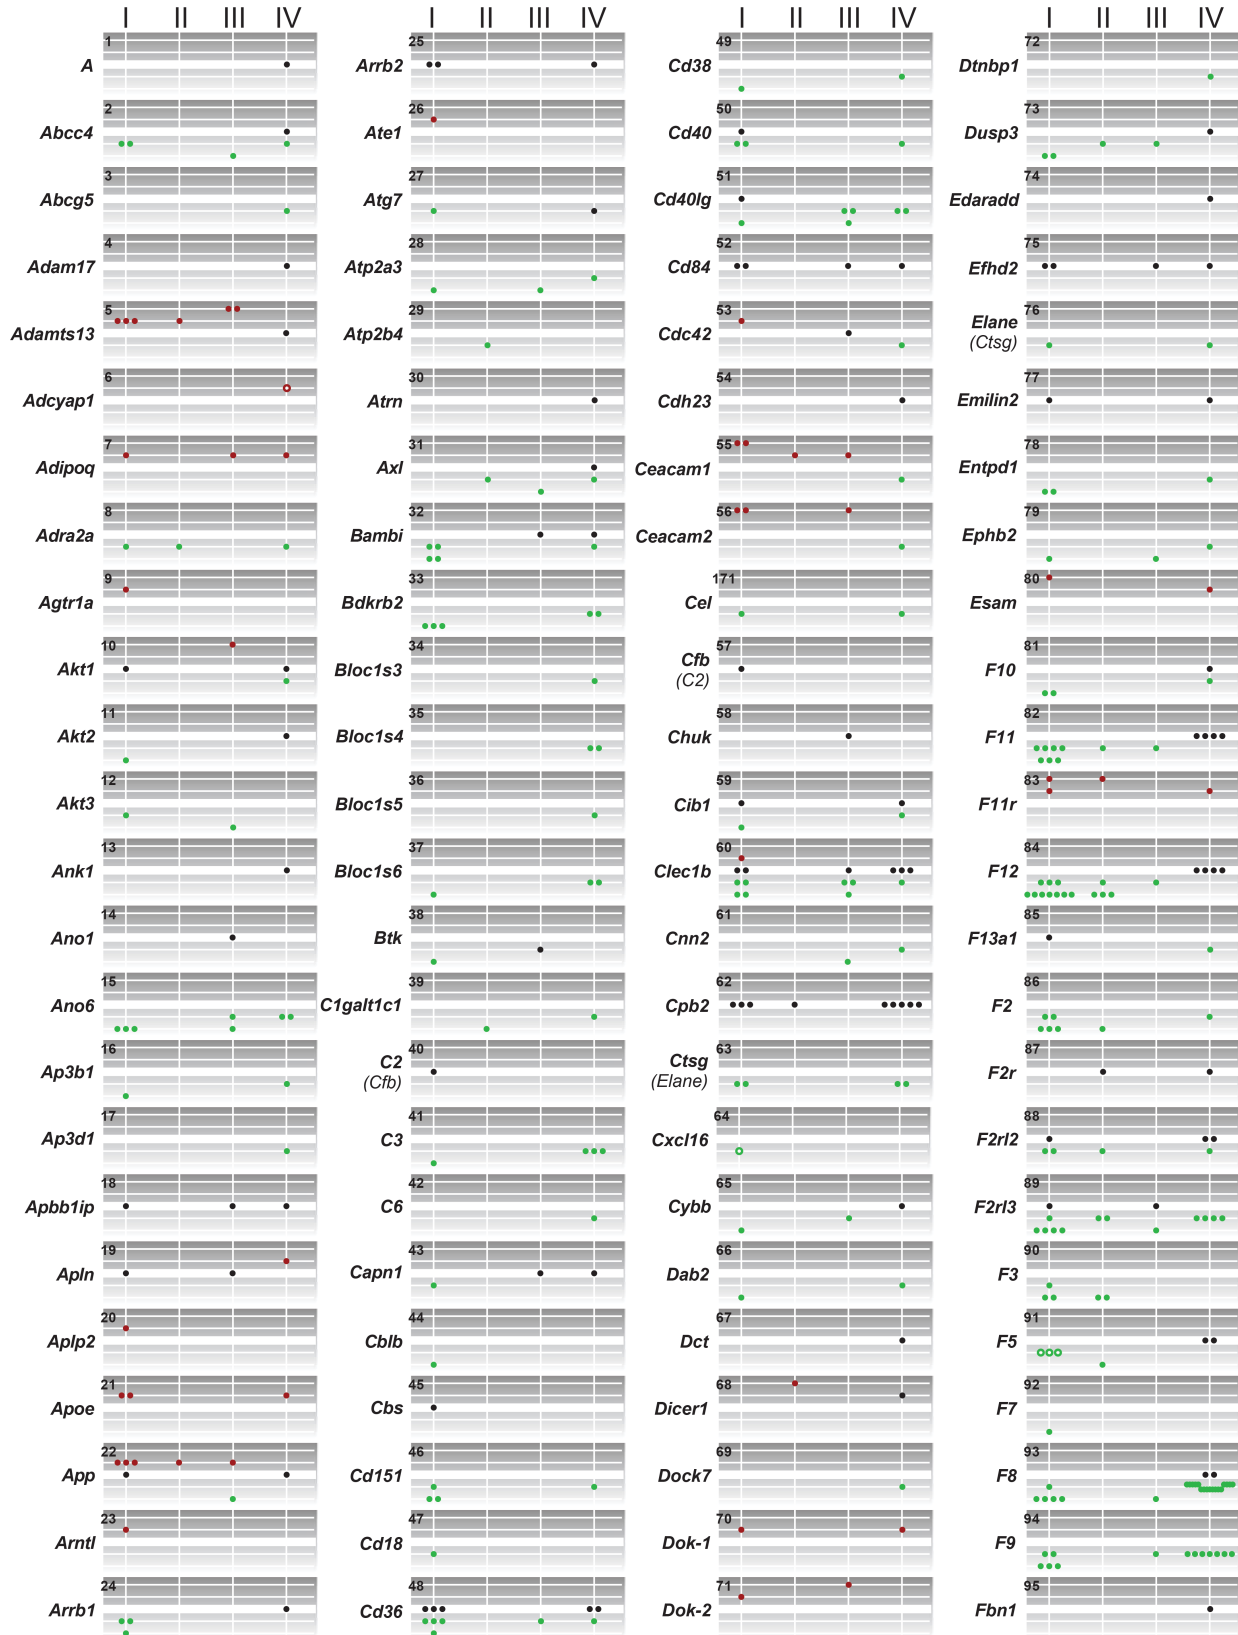

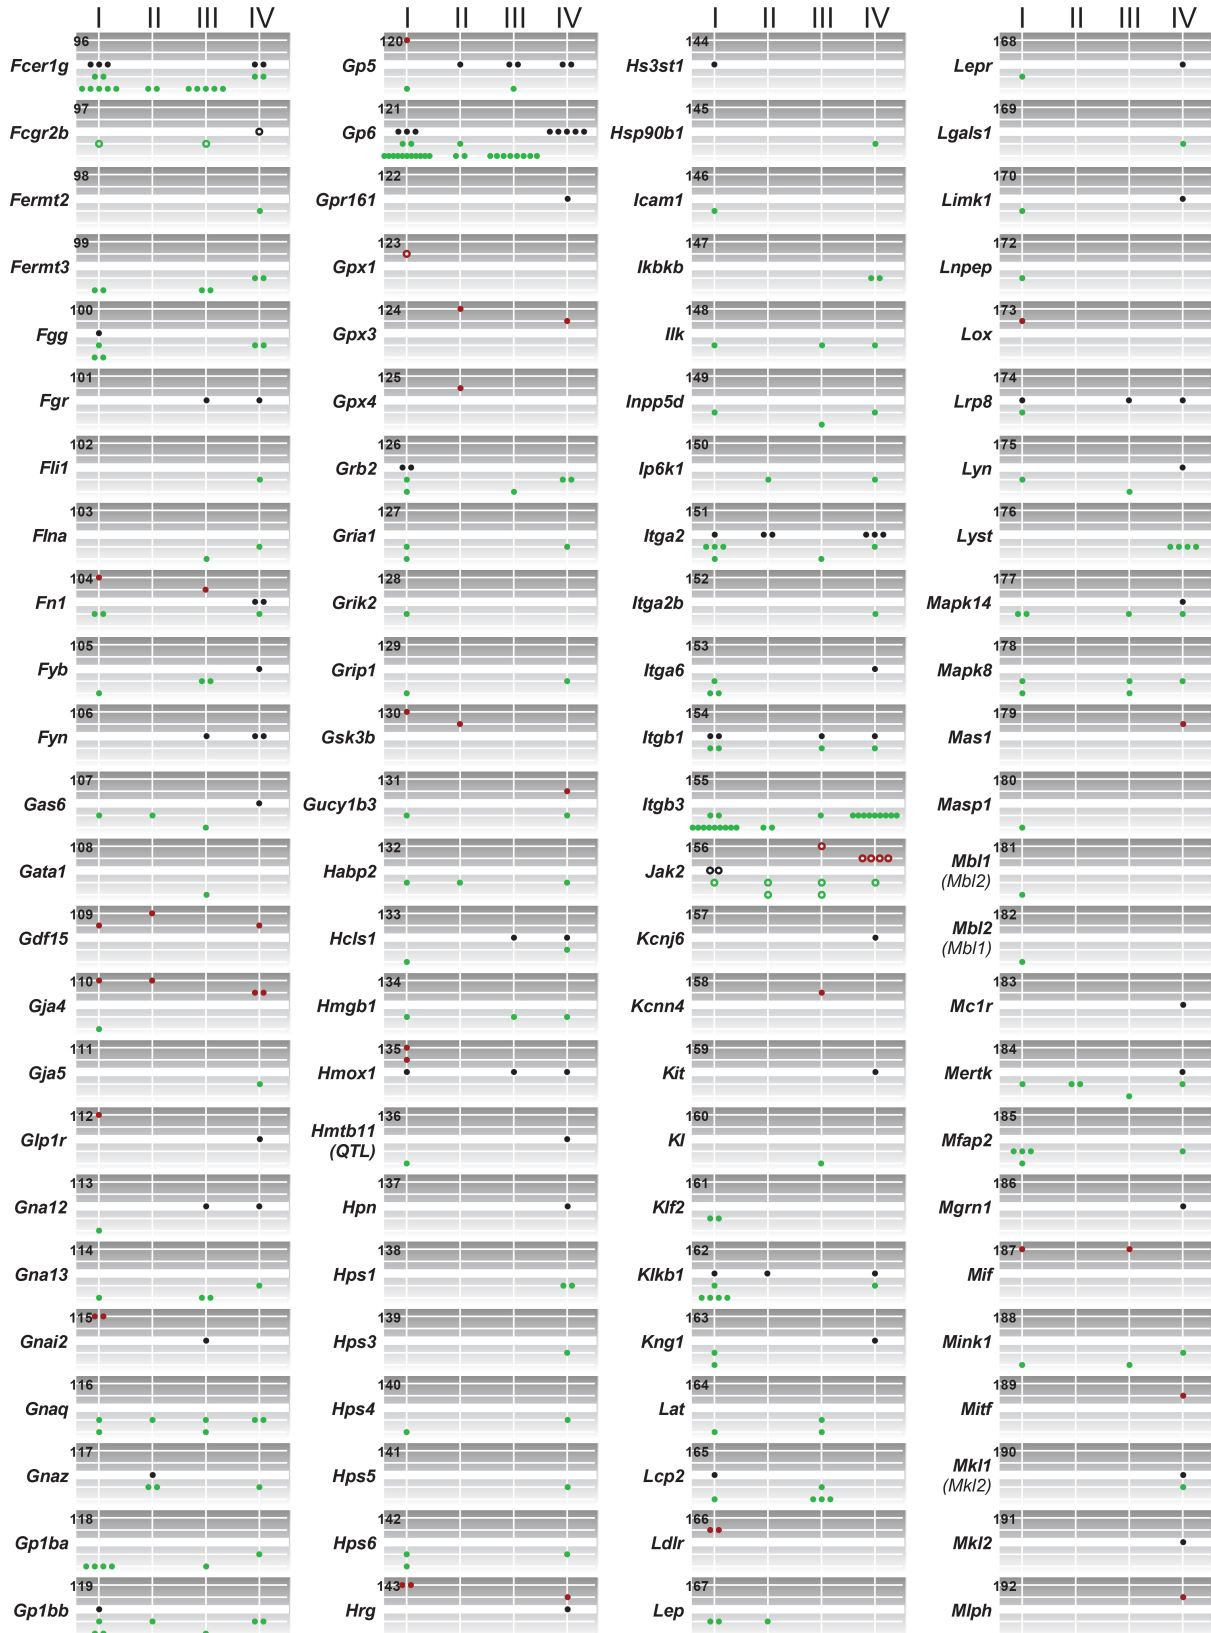



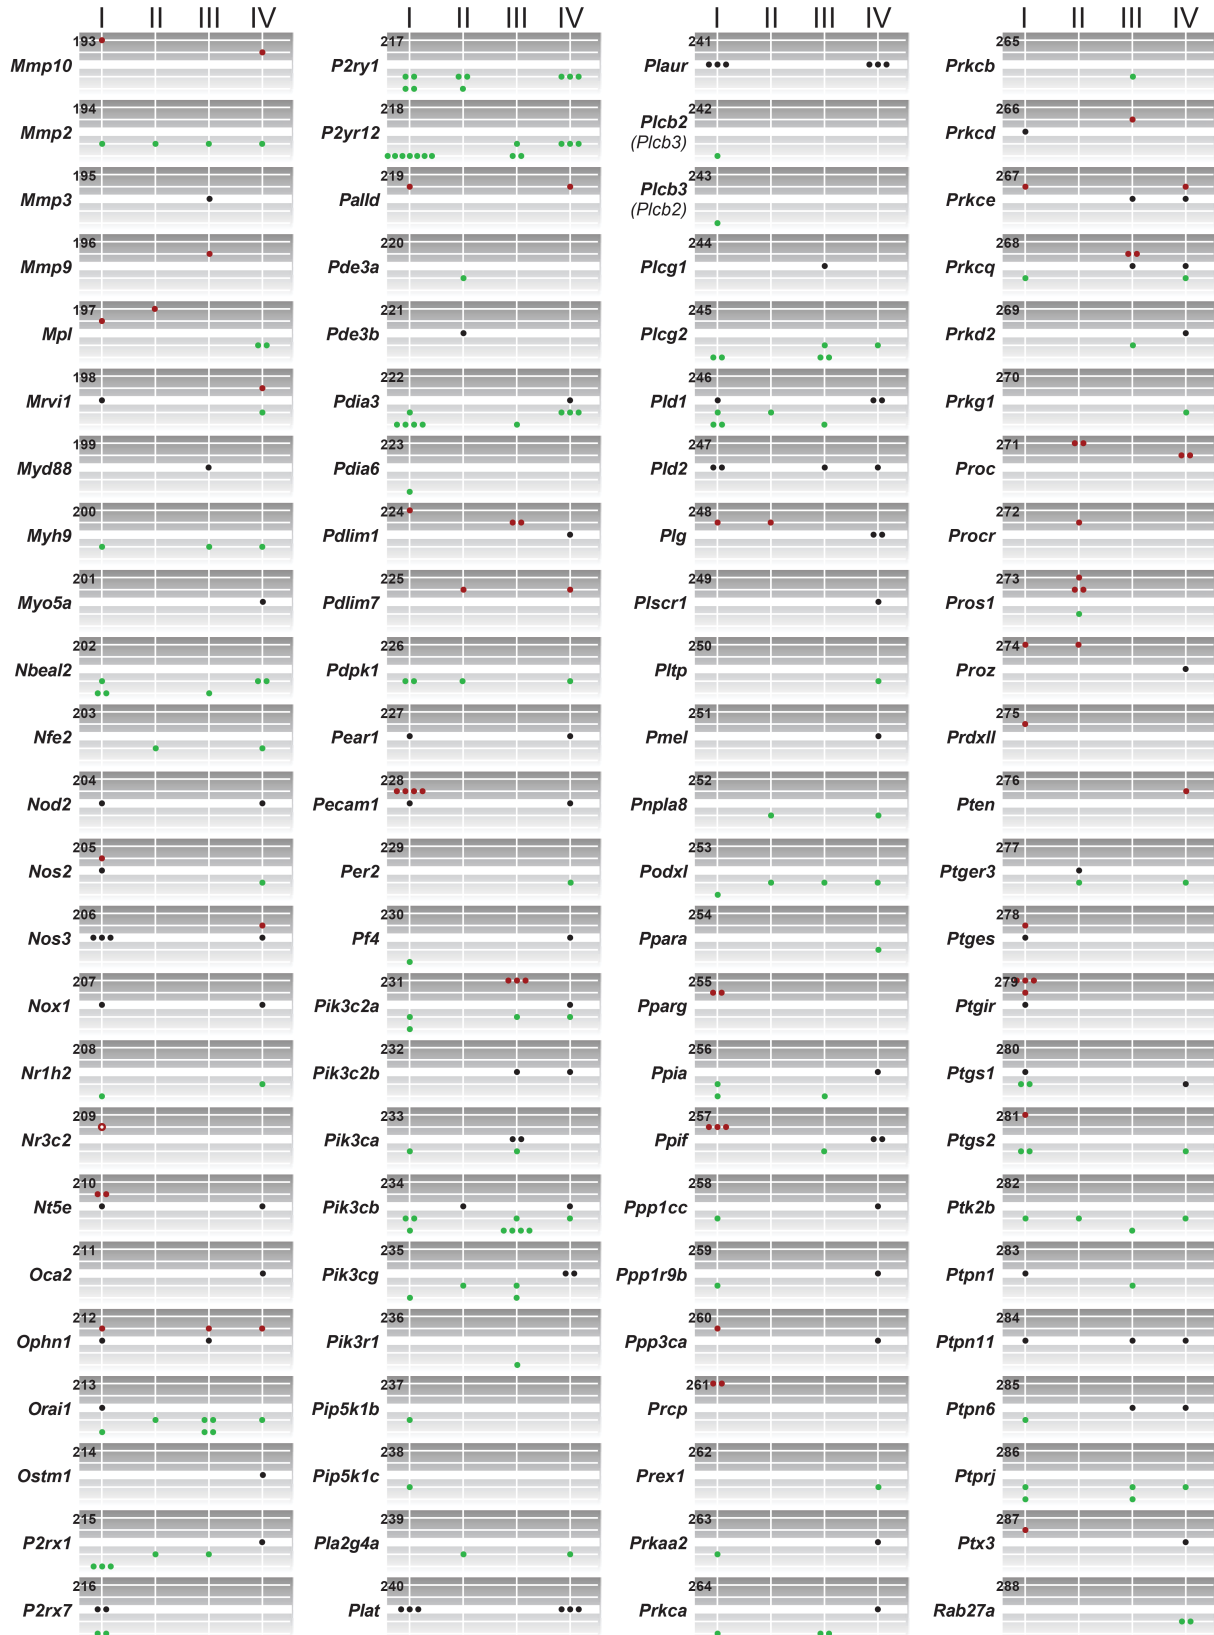

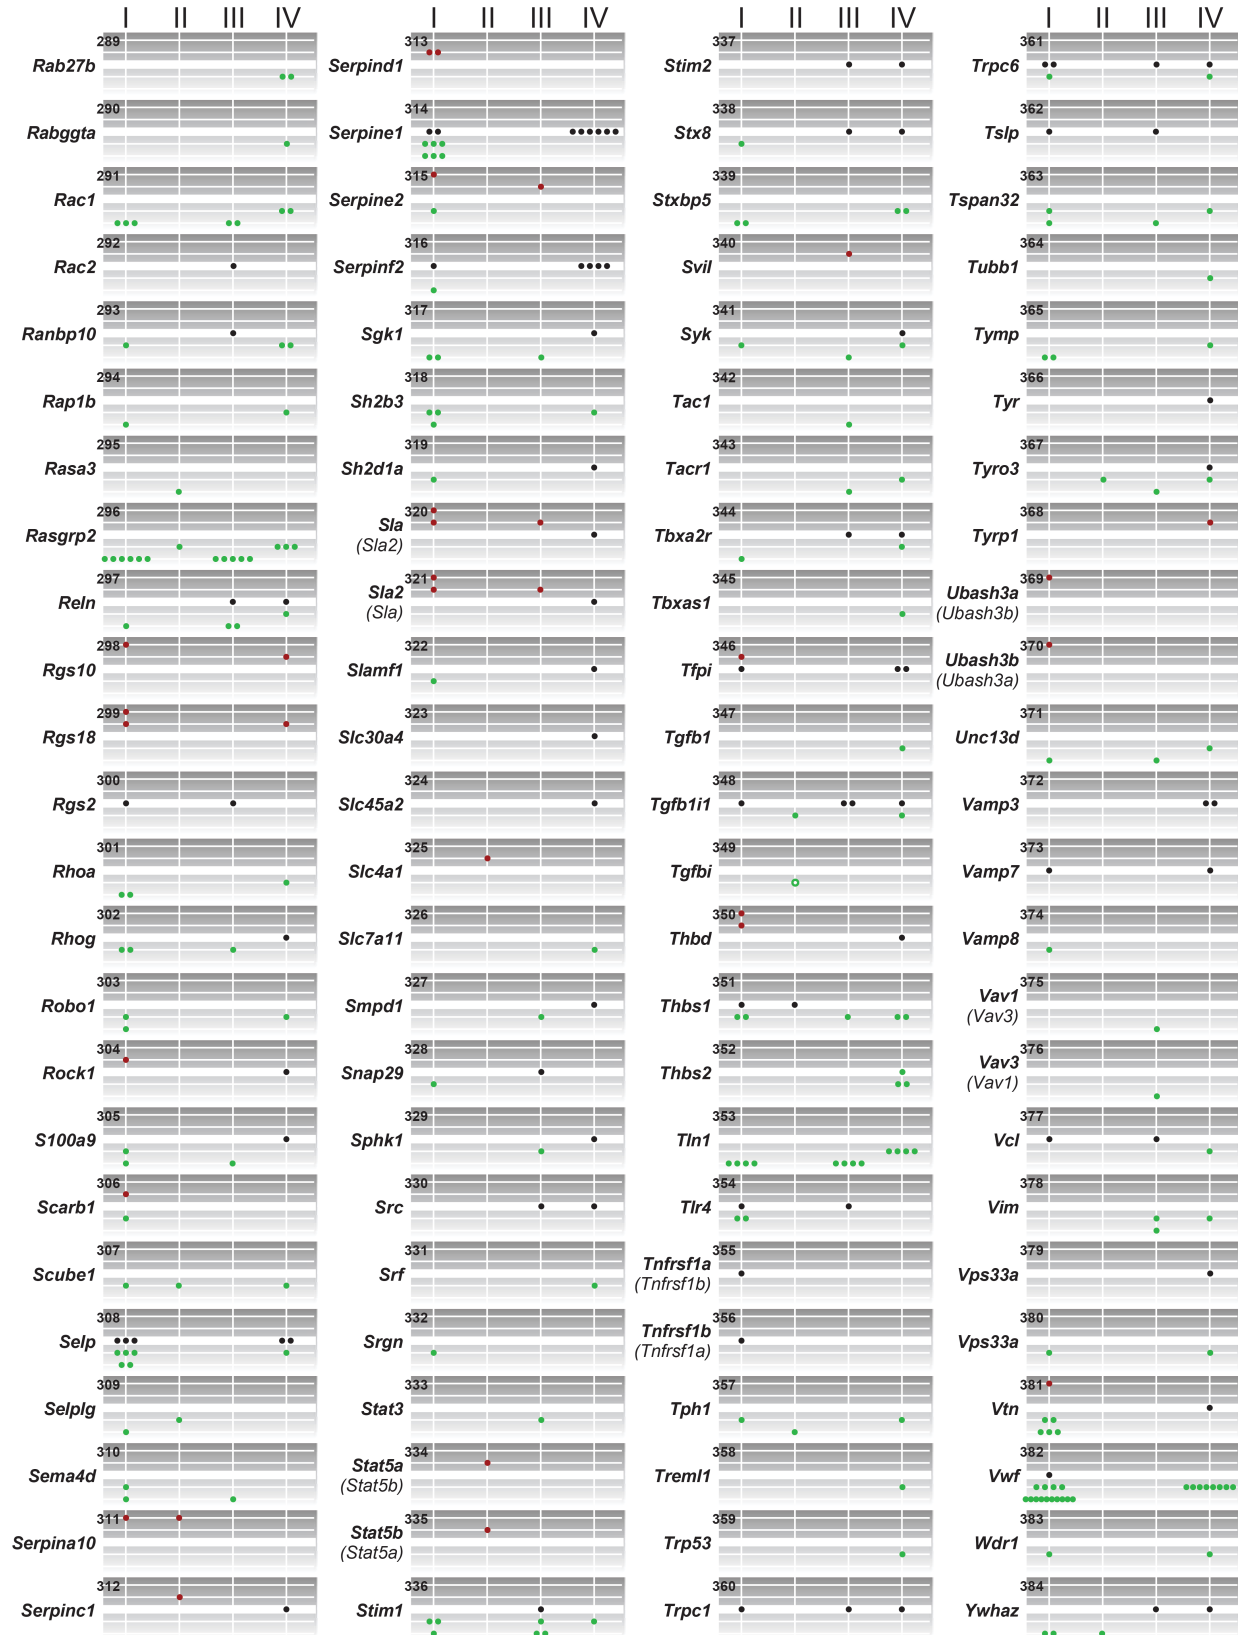

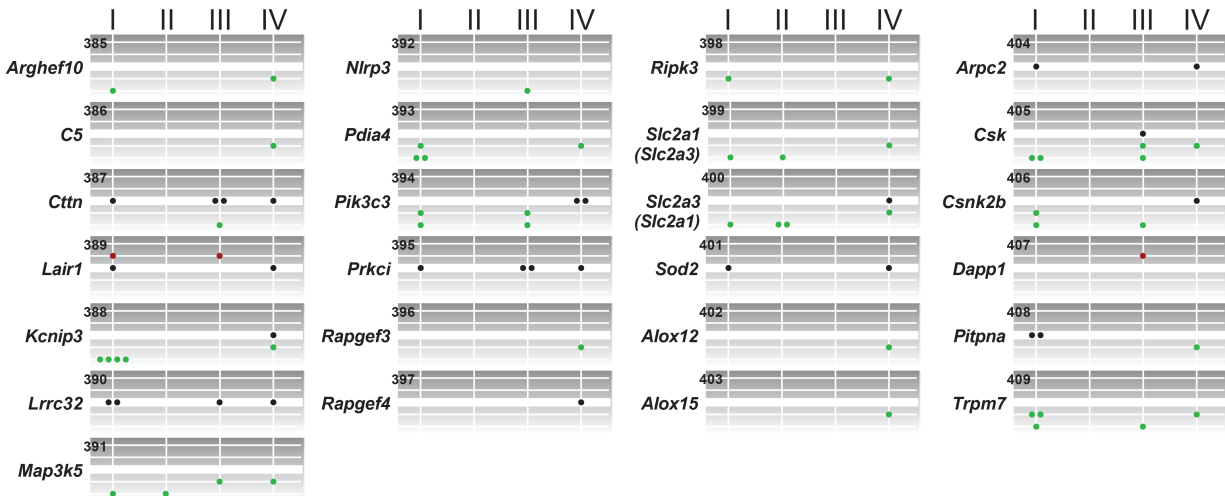

**Suppl. Figure 2. Overview per mouse gene and study of scores in classes I-IV.** Dots representing all individual studies, as scored in Classes I, II, III or IV, as indicated (for complete overview, see Data File 1). Open dots refer to a gain-of-function study, scored as if it were a loss-of-function. Green dots refer to negative scores, red dots to positive scores.

**A**

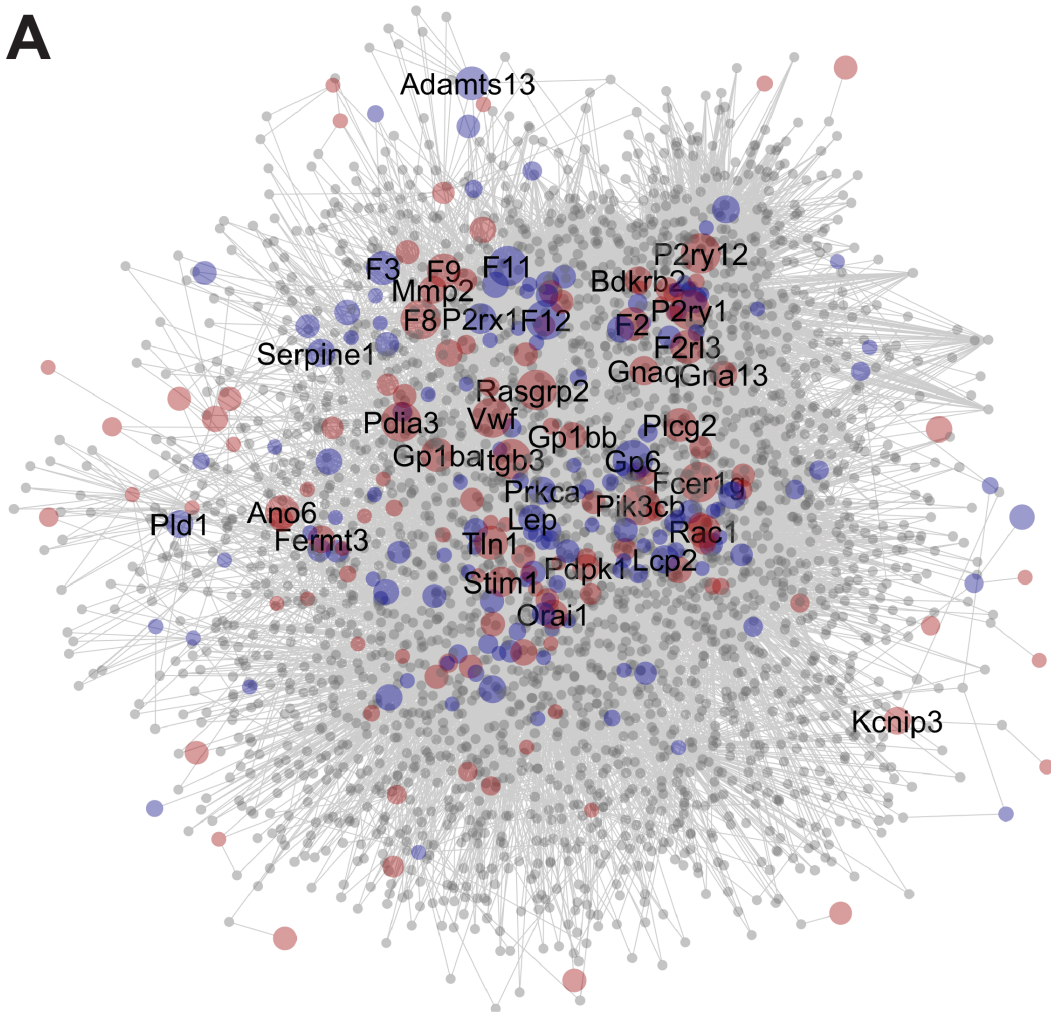

- Mouse thrombosis
- Mouse thrombosis and bleeding

**B**

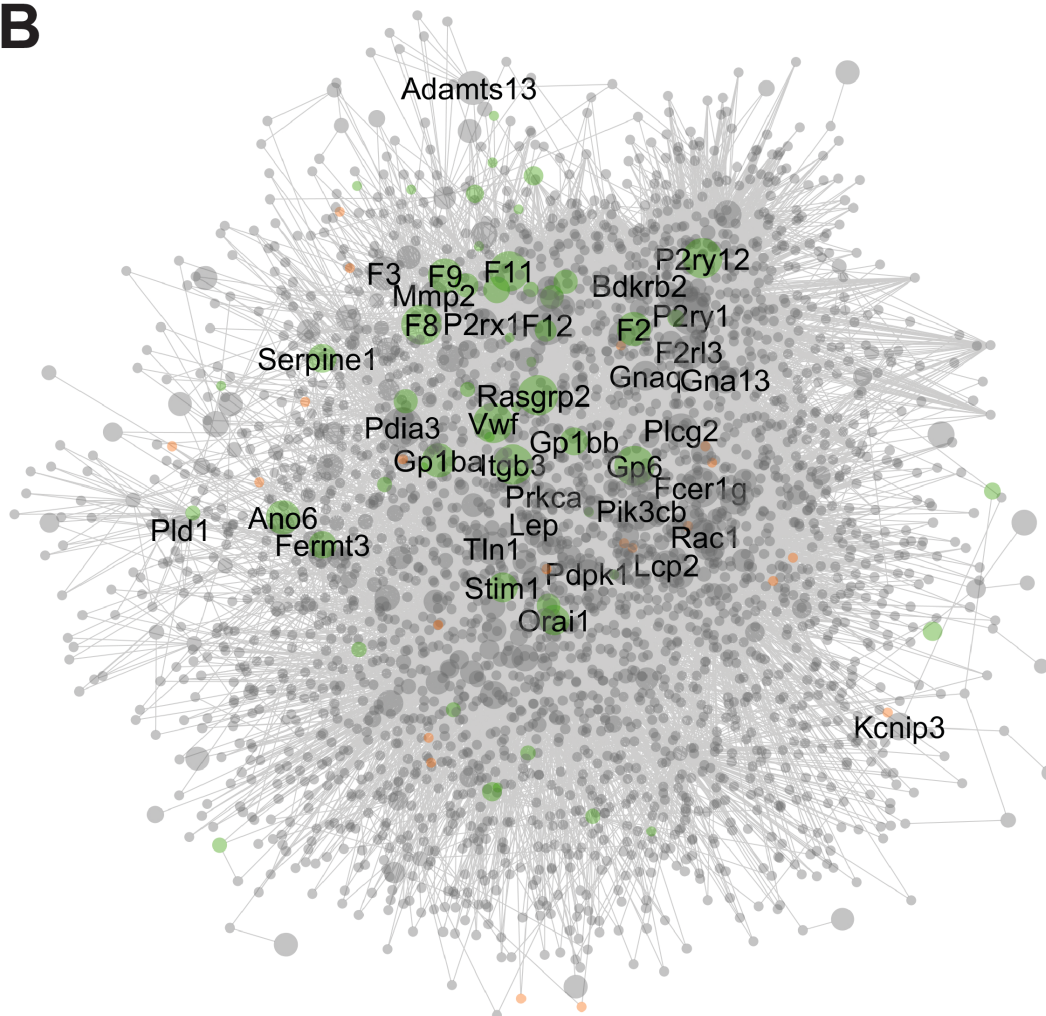

- Human Mendelian disorders
- GWAS Platelet\_count



C

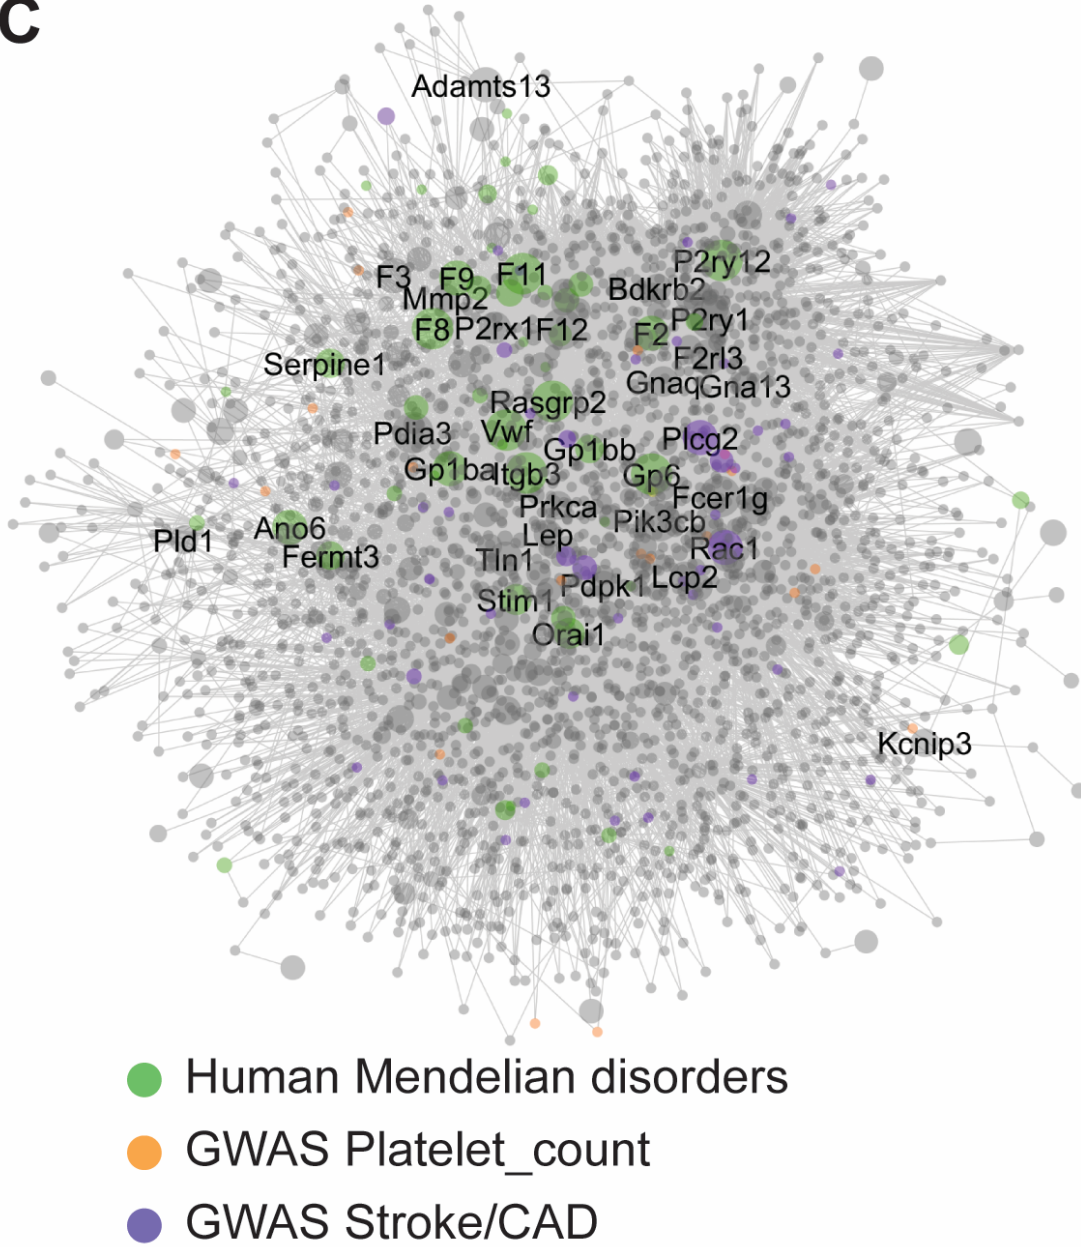

**D**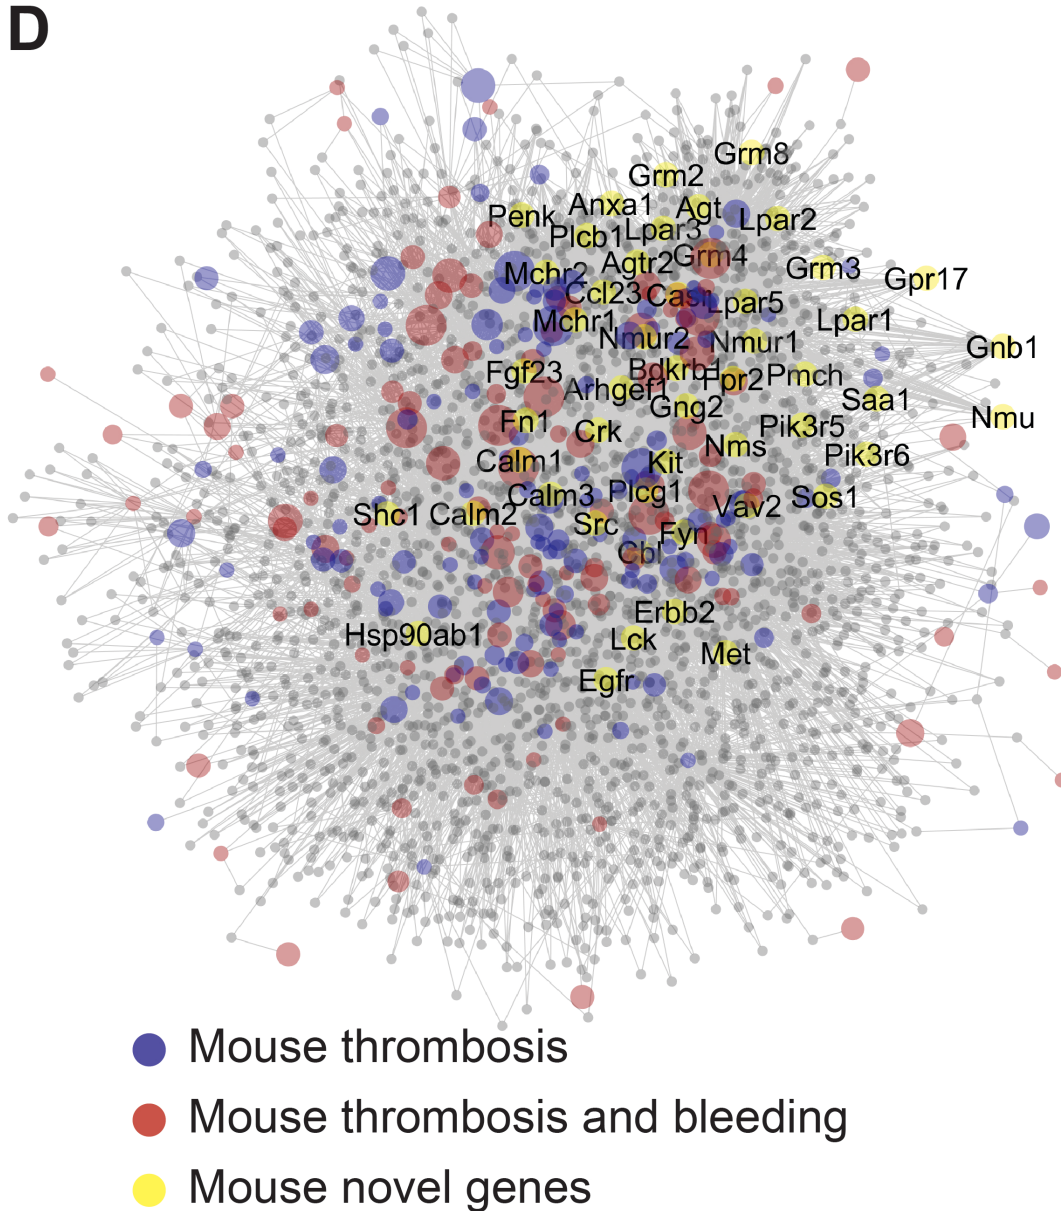

**Suppl. Figure 3. Network of protein interactions in thrombosis and hemostasis (PITH).** Network built in Cytoscape for 275 bait proteins, corresponding to mouse genes with modifying effect on arterial thrombosis of hemostasis. The final network has 267 core genes (bait nodes), 2679 new nodes, connected by 19721 interactions (edges). Of the edges, 15419 are derived from Reactome, 4299 from Intact, and 3 from manual assignment. Size of nodes is set as 1 per default, or as CP value. **A**, Network visualization with color-coded bait nodes: proteins modifying thrombosis (blue) or thrombosis + bleeding (red). Names are listed of 40 mouse genes with highest CP values. **B**, Network visualization with color-coded proteins linked to rare Mendelian disorders of human platelet or coagulant function (green,  $n=54$ ); proteins linked to high association genes in GWAS of platelet count and volume (orange,  $n=21$ ). **C**, Network visualization with additional color-coded proteins linked to Megastroke GWAS (purple,

$n=11$ ) or linked to coronary artery disease ( $n=40$ ). **D**, Network visualization emphasizing 50 novel nodes with largest number of edges ( $\geq 25$ , yellow). Attribute lists are given in Data File 6.



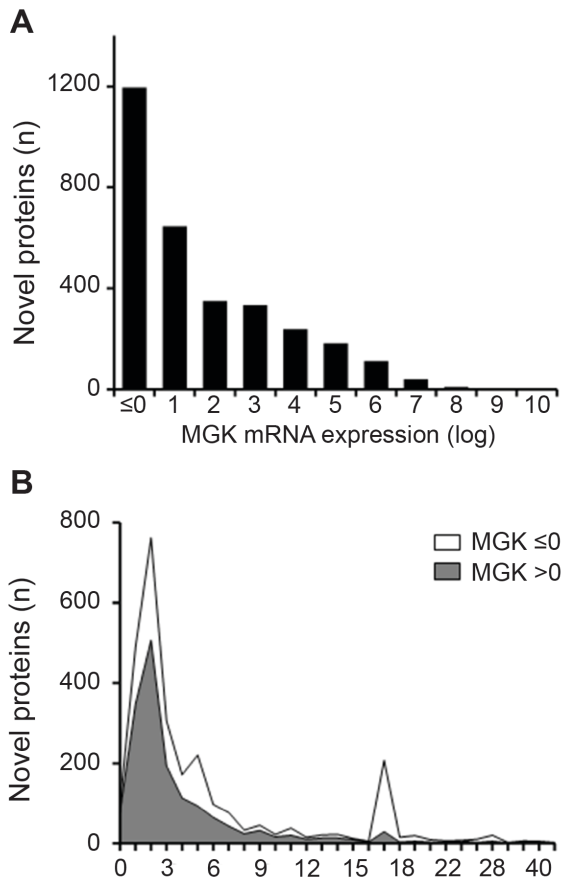

**Suppl. Figure 4. Buildup of protein-protein interaction network.** **A**, Distribution of 2,741 novel proteins in network with respect to mRNA expression in megakaryocytes (MGK). Values are given as log<sub>2</sub> (FPKM+1) (FPKM = fragments per kilobase of transcript per million mapped reads; values <1 are considered as a lack of transcription). **B**, Distribution of 2,741 novel proteins with respect to number of connections (edges) with modifying mouse proteins (thrombosis and/or bleeding).

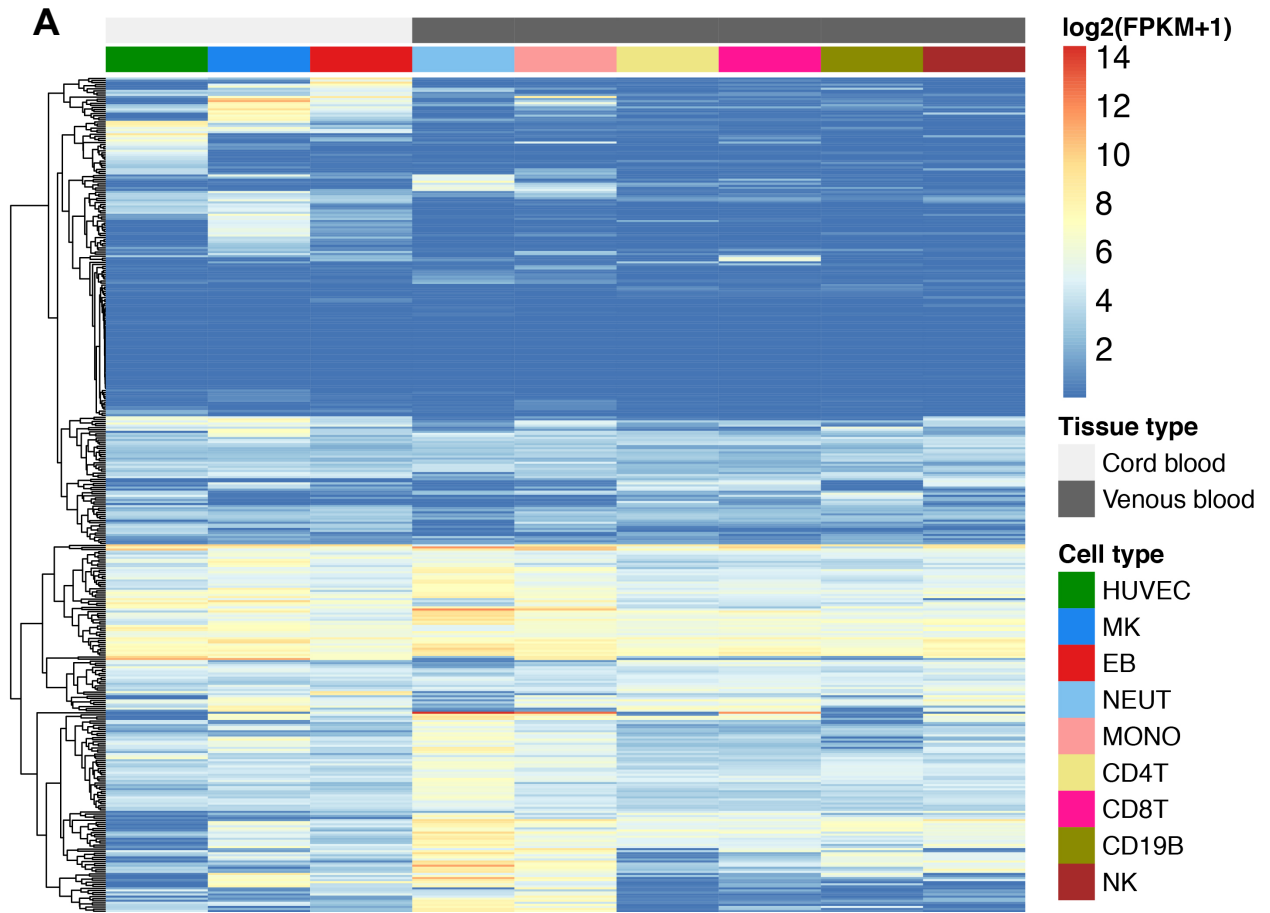

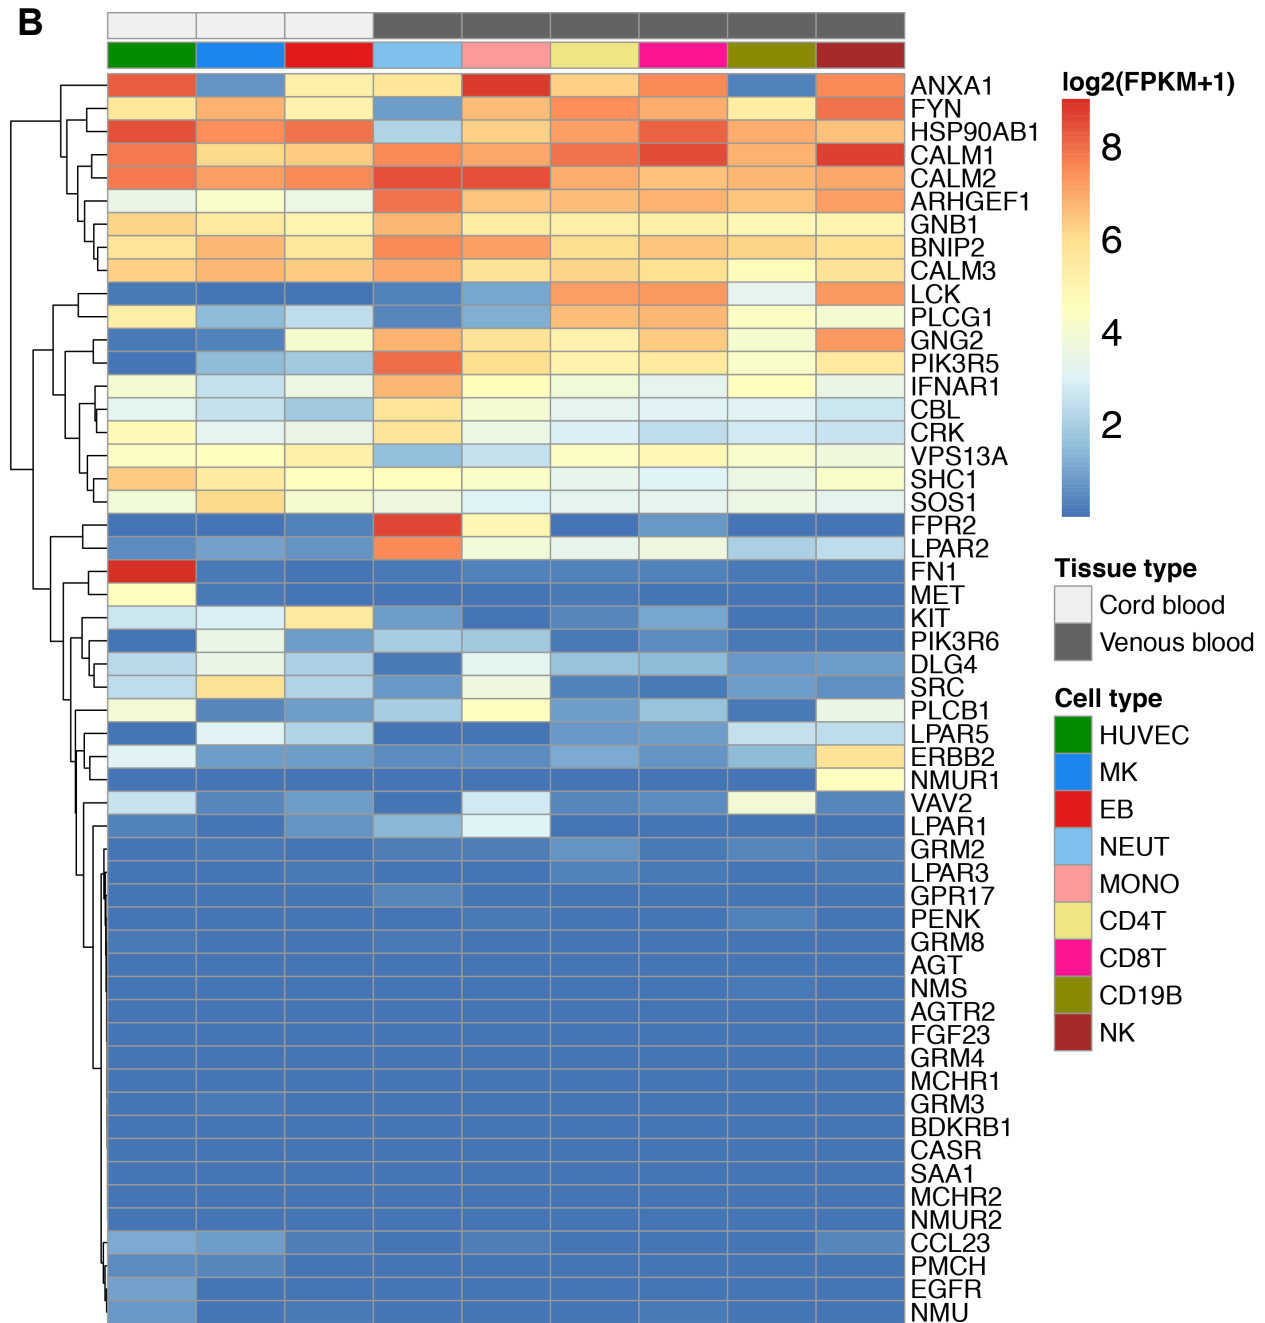

**Suppl. Figure 5. Clustered heatmap of relative mRNA expression levels in relevant blood cells.** Relative mRNA expression levels are shown for the 409 scored genes (A) and the top 50 most connected novel nodes (B), obtained from the Blueprint database,<sup>12</sup> of different cell types (see color code upper bar). Values are given as log<sub>2</sub> (FPKM+1), as in Suppl. Figure 3. Abbreviations: resting endothelial cells of umbilical vein (HUVEC), CD34-negative, CD41-positive, CD42-positive megakaryocytes (MK), erythroblasts (EB), mature neutrophils (NEUT), CD14-positive, CD16-negative classical monocytes (MONO), CD4-positive, alpha-beta T cells (CD4T), CD8-positive, alpha-beta T cells (CD8T), CD38-negative naive B cells (CD19B), and cytotoxic CD56-dim natural killer cells (NK).

**Suppl. Table 1. Key words and numbers of publications from search outcomes in PubMed.**

| <b>Keywords used for search</b>    | <b># Publications<br/>1980-2017</b> | <b>2018*</b> |
|------------------------------------|-------------------------------------|--------------|
| <i>Class I-III</i>                 |                                     |              |
| mouse & thrombus                   | 5740                                | 267          |
| mouse & thrombus & arterial        | 1440                                | 58           |
| mouse & thromboembolism            | 771                                 | 24           |
| mouse & thromboembolism & arterial | 211                                 | 4            |
| <i>Class IV</i>                    |                                     |              |
| mouse & bleeding                   | 8245                                | 355          |
| mouse & tail bleeding              | 594                                 | 32           |
| mouse & tail clipping              | 45                                  | 0            |

\*Studies added in 2018 (until August 1<sup>st</sup>) are included in gene lists, but not used for statistical analysis and calculations.

**Suppl. Table 2. Classification and grouping of analyzed mouse studies.** Indicated are the assignment of studies to classes and groups, as well as the evaluated output parameters of thrombus formation, thromboembolism or tail bleeding of indicated classes. For an overview, see Figure 1.

---

***Class I: in vivo arterial thrombosis***

***Groups compared (1-12)***

|                          |                                                                          |
|--------------------------|--------------------------------------------------------------------------|
| Carotid artery injury    | FeCl <sub>3</sub> (1); photochemical (2); ligation (3); electrolytic (4) |
| Aorta injury             | compression (5)                                                          |
| Mesenteric artery injury | FeCl <sub>3</sub> (6); photochemical (7); laser (8)                      |
| Cremaster artery injury  | FeCl <sub>3</sub> (9); photochemical (10); laser (11)                    |
| Other artery/injury      | any (12)                                                                 |

***Parameters compared (a-c)***

|                           |                                                                                                          |
|---------------------------|----------------------------------------------------------------------------------------------------------|
| Time-dependent parameters | time to platelet adhesion, time to occlusion or thrombus (a)                                             |
| Mass-dependent parameters | extent of platelet adhesion (bi); extent of occlusion (bii);<br>number, size or volume of thrombi (biii) |
| Stability parameters      | number or frequency of emboli (c)                                                                        |

***Class II: in vivo thromboembolism***

***Groups compared (20-23)***

|                |                                                                                    |
|----------------|------------------------------------------------------------------------------------|
| Provoked (d)   | injection of collagen/epinephrine (20); tissue factor (21); or<br>other agent (22) |
| Unprovoked (e) | pre/after birth (23)                                                               |

***Parameters compared***

|                            |                                                                                                        |
|----------------------------|--------------------------------------------------------------------------------------------------------|
| Thromboembolism parameters | percentage death, time to death, residual platelet count (d);<br>unprovoked thrombosis or bleeding (e) |
|----------------------------|--------------------------------------------------------------------------------------------------------|

***Class III: in vitro thrombus formation***

***Groups compared (30-34)***

|                  |                                                                              |
|------------------|------------------------------------------------------------------------------|
| Adhesive surface | collagen I (30); collagen III (31); VWF (32), fibrinogen (33);<br>other (34) |
|------------------|------------------------------------------------------------------------------|

***Parameters compared (f-h)***

|                           |                                                                                                            |
|---------------------------|------------------------------------------------------------------------------------------------------------|
| Time-dependent parameters | time to platelet adhesion, time to thrombus formation (f)                                                  |
| Mass-dependent parameters | extent of platelet adhesion (gi); surface area coverage (gii);<br>number, size or volume of thrombi (giii) |
| Stability parameters      | number or frequency of emboli (h)                                                                          |

***Class IV: bleeding time***

tail bleeding time

---

**Suppl. Table 3. Correlation analysis of intra-study sub-parameters scored on 3-point or 5-point scale.** Indicated are numbers of studies per parameter, Kendall's Tau correlation coefficients, and *P* values regarding sub-parameters **bi-iii**, **gi-iii** and regarding parameters **a-c** and **f-h**. **A**, Comparison of mass-dependent sub-parameters in class I studies (**bi**, platelet adhesion; **bii**, extent of occlusion; **biii**, thrombus size, volume or number). **B**, Comparison of mass-dependent sub-parameters in class III studies (**gi**, platelet adhesion; **gii**, surface-area-coverage; **giii**, thrombus size, volume or number). **C**, Comparison of time-dependent (**a**), mass-dependent (**b**), and stability (**c**) parameters in class I studies. Time-dependent parameters (**a/f**) included time to occlusion and time to thrombus formation; stability parameters (**c/h**) included number of emboli. **D**, Comparison of time-dependent (**f**), mass-dependent (**g**), and stability (**h**) parameters for all class III studies. Green cells indicate statistical significance.

| <b>A</b>                         |    |        |       | <b>B</b>                         |    |        |        | <b>C</b>                         |     |        |        | <b>D</b>                         |    |       |       |
|----------------------------------|----|--------|-------|----------------------------------|----|--------|--------|----------------------------------|-----|--------|--------|----------------------------------|----|-------|-------|
| Number of studies                |    |        |       | Number of studies                |    |        |        | Number of studies                |     |        |        | Number of studies                |    |       |       |
|                                  | bi | bii    | biii  |                                  | gi | gii    | giii   |                                  | a   | b      | c      |                                  | f  | g     | h     |
| bi                               | 75 |        |       | gi                               | 42 |        |        | a                                | 402 |        |        | f                                | 13 |       |       |
| bii                              | 9  | 87     |       | gii                              | 24 | 198    |        | b                                | 95  | 278    |        | g                                | 10 | 239   |       |
| biii                             | 20 | 10     | 153   | giii                             | 12 | 74     | 105    | c                                | 48  | 46     | 80     | h                                | 0  | 17    | 17    |
| Kendall's $\tau$ (3-point scale) |    |        |       | Kendall's $\tau$ (3-point scale) |    |        |        | Kendall's $\tau$ (3-point scale) |     |        |        | Kendall's $\tau$ (3-point scale) |    |       |       |
|                                  | bi | bii    | biii  |                                  | gi | gii    | giii   |                                  | a   | b      | c      |                                  | f  | g     | h     |
| bi                               |    |        |       | gi                               |    |        |        | a                                |     |        |        | f                                |    |       |       |
| bii                              |    | 0.81   |       | gii                              |    | 0.64   |        | b                                |     | 0.80   |        | g                                |    | 0.67  |       |
| biii                             |    | 0.84   | 1.00  | giii                             |    | 1.00   | 0.74   | c                                |     | 0.43   | 0.65   | h                                |    | -     | 0.81  |
| P-value (3-point scale)          |    |        |       | P-value (3-point scale)          |    |        |        | P-value (3-point scale)          |     |        |        | P-value (3-point scale)          |    |       |       |
|                                  | bi | bii    | biii  |                                  | gi | gii    | giii   |                                  | a   | b      | c      |                                  | f  | g     | h     |
| bi                               |    |        |       | gi                               |    |        |        | a                                |     |        |        | f                                |    |       |       |
| bii                              |    | 0.015  |       | gii                              |    | 0.001  |        | b                                |     | <0.001 |        | g                                |    | 0.046 |       |
| biii                             |    | <0.001 | <0.01 | giii                             |    | <0.01  | <0.001 | c                                |     | 0.002  | <0.001 | h                                |    | -     | 0.001 |
| Kendall's $\tau$ (5-point scale) |    |        |       | Kendall's $\tau$ (5-point scale) |    |        |        | Kendall's $\tau$ (5-point scale) |     |        |        | Kendall's $\tau$ (5-point scale) |    |       |       |
|                                  | bi | bii    | biii  |                                  | gi | gii    | giii   |                                  | a   | b      | c      |                                  | f  | g     | h     |
| bi                               |    |        |       | gi                               |    |        |        | a                                |     |        |        | f                                |    |       |       |
| bii                              |    | 0.50   |       | gii                              |    | 0.54   |        | b                                |     | 0.73   |        | g                                |    | 0.56  |       |
| biii                             |    | 0.70   | 0.79  | giii                             |    | 0.93   | 0.66   | c                                |     | 0.16   | 0.61   | h                                |    | -     | 0.75  |
| P-value (5-point scale)          |    |        |       | P-value (5-point scale)          |    |        |        | P-value (5-point scale)          |     |        |        | P-value (5-point scale)          |    |       |       |
|                                  | bi | bii    | biii  |                                  | gi | gii    | giii   |                                  | a   | b      | c      |                                  | f  | g     | h     |
| bi                               |    |        |       | gi                               |    |        |        | a                                |     |        |        | f                                |    |       |       |
| bii                              |    | 0.102  |       | gii                              |    | 0.003  |        | b                                |     | <0.001 |        | g                                |    | 0.072 |       |
| biii                             |    | <0.001 | 0.006 | giii                             |    | <0.001 | <0.001 | c                                |     | 0.226  | <0.001 | h                                |    | -     | 0.001 |

**Suppl. Table 4. Correlation analysis of mean study scores per class on 3-point or 5-point scale.** Comparisons of study scores on 3-point or 5-point scales separated according to classes I, II and III. **A**, Comparison between classes per studies published in the same paper (identical mouse strain). **B**, Comparison between classes per gene (loss-of function mutations only). Panels show numbers of studies or genes compared, Kendall's Tau correlation coefficients, and *P* values (3-point or 5-point scores, as indicated). Green cells indicate statistical significance with *P*<0.05.

**A**

*Number of studies*

|     | I | II  | III |     |
|-----|---|-----|-----|-----|
| I   |   | 602 |     |     |
| II  |   | 54  | 102 |     |
| III |   | 151 | 14  | 286 |

**B**

*Number of genes*

|     | I | II  | III |     |
|-----|---|-----|-----|-----|
| I   |   | 278 |     |     |
| II  |   | 51  | 79  |     |
| III |   | 129 | 32  | 161 |

*Kendall's  $\tau$  (3-point scale)*

|     | I | II   | III  |
|-----|---|------|------|
| I   |   |      |      |
| II  |   | 0.79 |      |
| III |   | 0.76 | 0.71 |

*Kendall's  $\tau$  (3-point scale)*

|     | I | II   | III  |
|-----|---|------|------|
| I   |   |      |      |
| II  |   | 0.80 |      |
| III |   | 0.70 | 0.52 |

*P-value (3-point scale)*

|     | I | II     | III   |
|-----|---|--------|-------|
| I   |   |        |       |
| II  |   | <0.001 |       |
| III |   | <0.001 | 0.006 |

*P-value (3-point scale)*

|     | I | II     | III   |
|-----|---|--------|-------|
| I   |   |        |       |
| II  |   | <0.001 |       |
| III |   | <0.001 | 0.003 |

*Kendall's  $\tau$  (5-point scale)*

|     | I | II   | III  |
|-----|---|------|------|
| I   |   |      |      |
| II  |   | 0.68 |      |
| III |   | 0.64 | 0.25 |

*Kendall's  $\tau$  (5-point scale)*

|     | I | II   | III  |
|-----|---|------|------|
| I   |   |      |      |
| II  |   | 0.61 |      |
| III |   | 0.58 | 0.09 |

*P-value (5-point scale)*

|     | I | II     | III   |
|-----|---|--------|-------|
| I   |   |        |       |
| II  |   | <0.001 |       |
| III |   | <0.001 | 0.286 |

*P-value (5-point scale)*

|     | I | II     | III   |
|-----|---|--------|-------|
| I   |   |        |       |
| II  |   | <0.001 |       |
| III |   | <0.001 | 0.556 |

**Suppl. Table 5. Numbers of scored mouse genes per class and group.** For description of classes and groups, see Suppl. Table 1.

*Class I (number of genes)*

|    |                             | 1 | 2   | 3  | 4  | 5 | 6  | 7  | 8 | 9  | 10 | 11 | 12 |    |
|----|-----------------------------|---|-----|----|----|---|----|----|---|----|----|----|----|----|
| 1  | Carotis FeCl <sub>3</sub>   |   | 161 |    |    |   |    |    |   |    |    |    |    |    |
| 2  | Carotis photochemical       |   | 19  | 38 |    |   |    |    |   |    |    |    |    |    |
| 3  | Carotis ligation            |   | 7   | 3  | 13 |   |    |    |   |    |    |    |    |    |
| 4  | Carotis electrolytical      |   | 5   | 0  | 3  | 8 |    |    |   |    |    |    |    |    |
| 5  | Aorta compression           |   | 6   | 1  | 0  | 0 | 16 |    |   |    |    |    |    |    |
| 6  | Mesentery FeCl <sub>3</sub> |   | 43  | 9  | 7  | 2 | 12 | 97 |   |    |    |    |    |    |
| 7  | Mesentery photochemical     |   | 1   | 1  | 0  | 0 | 0  | 1  | 3 |    |    |    |    |    |
| 8  | Mesentery laser             |   | 8   | 0  | 1  | 1 | 1  | 6  | 0 | 14 |    |    |    |    |
| 9  | Cremaster FeCl <sub>3</sub> |   | 2   | 0  | 1  | 1 | 0  | 4  | 0 | 2  | 5  |    |    |    |
| 10 | Cremaster photochemical     |   | 6   | 0  | 0  | 0 | 0  | 3  | 0 | 1  | 0  | 12 |    |    |
| 11 | Cremaster laser             |   | 19  | 4  | 4  | 3 | 2  | 19 | 0 | 5  | 5  | 2  | 60 |    |
| 12 | Other                       |   | 4   | 4  | 2  | 1 | 2  | 6  | 0 | 3  | 1  | 0  | 1  | 12 |

*Class II (number of genes)*

|    |                                | 20 | 21 | 22 | 23 |    |
|----|--------------------------------|----|----|----|----|----|
| 20 | Injection collagen-epinephrine |    | 49 |    |    |    |
| 21 | Injection tissue factor        |    | 2  | 10 |    |    |
| 22 | Injection other                |    | 1  | 0  | 11 |    |
| 23 | Systemic other                 |    | 0  | 1  | 0  | 12 |

*Class III (number of genes)*

|    |                       | 30 | 31  | 32 | 33 | 34 |   |
|----|-----------------------|----|-----|----|----|----|---|
| 30 | Collagen I            |    | 156 |    |    |    |   |
| 31 | Collagen III          |    | 4   | 8  |    |    |   |
| 32 | von Willebrand factor |    | 4   | 0  | 4  |    |   |
| 33 | Fibrinogen            |    | 2   | 1  | 0  | 3  |   |
| 34 | Other                 |    | 3   | 0  | 0  | 0  | 4 |

*Class IV (number of genes)*

|    |               | 40  |
|----|---------------|-----|
| 40 | Tail bleeding | 314 |



**Suppl. Table 6. Node connections in PITH network for top 50 most connected proteins.** Also indicated are: numbers of interactors in network, mRNA expression levels in megakaryocytes (MK)<sup>12</sup>, human UniProt identifiers, protein names, OMIM identifiers regarding disease associations, and GWAS data (1: Mendelian disorders<sup>6</sup>, 2: Platelet\_count<sup>7</sup>, 3: Platelet\_traits<sup>8</sup>, 4: Stroke<sup>9</sup> and 5: CAD<sup>10</sup>)

| Gene     | Number of interactors in PITH network | mRNA expression | UniProt identifier (human) | Protein name                                                      | OMIM identifier | GWAS |
|----------|---------------------------------------|-----------------|----------------------------|-------------------------------------------------------------------|-----------------|------|
| EGFR     | 51                                    | 0.02            | P00533                     | Epidermal growth factor receptor                                  | *131550         |      |
| FYN      | 43                                    | 6.79            | P06241                     | Tyrosine-protein kinase Fyn                                       | *137025         |      |
| GNB1     | 39                                    | 5.56            | P62873                     | Guanine nucleotide-binding protein G(I)/G(S)/G(T) subunit beta-1  | *139380         |      |
| GNG2     | 37                                    | 0.35            | P59768                     | Guanine nucleotide-binding protein G(I)/G(S)/G(O) subunit gamma-2 | *606981         |      |
| PIK3R5   | 37                                    | 1.51            | Q8WYR1                     | Phosphoinositide 3-kinase regulatory subunit 5                    | *611317         |      |
| PIK3R6   | 37                                    | 3.43            | Q5UE93                     | Phosphoinositide 3-kinase regulatory subunit 6                    | *611462         |      |
| SRC      | 37                                    | 5.80            | P12931                     | Proto-oncogene tyrosine-protein kinase Src                        | *190090         |      |
| FN1      | 35                                    | 0.12            | P02751                     | Fibronectin                                                       | *135600         |      |
| SHC1     | 35                                    | 5.47            | P29353                     | SHC-transforming protein 1                                        | *600560         |      |
| PLCB1    | 33                                    | 0.40            | Q9NQ66                     | 1-Phosphatidylinositol 4,5-bisphosphate phosphodiesterase beta-1  | *607120         |      |
| ANXA1    | 31                                    | 0.64            | P04083                     | Annexin A1                                                        | *151690         |      |
| ERBB2    | 31                                    | 0.89            | P04626                     | Receptor tyrosine-protein kinase erbB2                            | *164870         |      |
| LCK      | 31                                    | 0.02            | P06239                     | Tyrosine-protein kinase Lck                                       | *153390         |      |
| PLCG1    | 31                                    | 1.50            | P19174                     | 1-phosphatidylinositol 4,5-bisphosphate phosphodiesterase gamma-1 | *172420         | 5    |
| SOS1     | 31                                    | 6.11            | Q07889                     | Son of sevenless homolog 1                                        | *182530         |      |
| AGT      | 29                                    | 0.05            | P01019                     | Angiotensinogen                                                   | +106150         | 5    |
| HSP90AB1 | 29                                    | 7.41            | P08238                     | Heat shock protein HSP 90-beta                                    | *140572         |      |
| MET      | 29                                    | 0.09            | P08581                     | Hepatocyte growth factor receptor                                 | *164860         |      |
| CRK      | 28                                    | 3.31            | P46108                     | Adapter molecule crk                                              | *164762         |      |
| SAA1     | 28                                    | 0.00            | P0DJ18                     | Serum amyloid A-1 protein                                         | *104750         |      |
| BDKRB1   | 27                                    | 0.00            | P46663                     | B1 bradykinin receptor                                            | *600337         |      |
| CALM1    | 27                                    | 6.11            | P0DP23                     | Calmodulin-1                                                      | *114180         |      |

|         |    |      |        |                                                   |         |     |
|---------|----|------|--------|---------------------------------------------------|---------|-----|
| CALM2   | 27 | 7.16 | P0DP24 | Calmodulin-2                                      | *114182 |     |
| CALM3   | 27 | 6.75 | P0DP25 | Calmodulin-3                                      | *114183 |     |
| CASR    | 27 | 0.00 | P41180 | Extracellular calcium-sensing receptor            | +601199 |     |
| CCL23   | 27 | 0.84 | P55773 | C-C motif chemokine 23                            | *602494 |     |
| FPR2    | 27 | 0.06 | P25090 | N-formyl peptide receptor 2                       | *136538 |     |
| GPR17   | 27 | 0.00 | Q13304 | Uracil nucleotide/cysteinyll leukotriene receptor | *603071 |     |
| KIT     | 27 | 2.91 | P10721 | Mast/stem cell growth factor receptor Kit         | *164920 |     |
| LPAR1   | 27 | 0.06 | Q92633 | Lysophosphatidic acid receptor 1                  | *602282 |     |
| LPAR2   | 27 | 0.94 | Q9HBW0 | Lysophosphatidic acid receptor 2                  | *605110 |     |
| LPAR3   | 27 | 0.01 | Q9UBY5 | Lysophosphatidic acid receptor 3                  | *605106 |     |
| LPAR5   | 27 | 3.11 | Q9H1C0 | Lysophosphatidic acid receptor 5                  | *606926 |     |
| MCHR1   | 27 | 0.02 | Q99705 | Melanin-concentrating hormone receptor 1          | *601751 |     |
| MCHR2   | 27 | 0.00 | Q969V1 | Melanin-concentrating hormone receptor 2          | *606111 |     |
| NMS     | 27 | 0.01 | Q5H8A3 | Neuromedin-S                                      | -       |     |
| NMU     | 27 | 0.01 | P48645 | Neuromedin-U                                      | *605103 |     |
| NMUR1   | 27 | 0.00 | Q9HB89 | Neuromedin-U receptor 1                           | *604153 |     |
| NMUR2   | 27 | 0.00 | Q9GZQ4 | Neuromedin-U receptor 2                           | *605108 |     |
| PENK    | 27 | 0.02 | P01210 | Proenkephalin-A                                   | *131330 |     |
| PMCH    | 27 | 0.40 | P20382 | Pro-MCH                                           | *176795 |     |
| VAV2    | 27 | 0.38 | P52735 | Guanine nucleotide exchange factor VAV2           | *600428 |     |
| CBL     | 26 | 2.46 | P22681 | E3 ubiquitin-protein ligase CBL                   | *165360 | 2/3 |
| FGF23   | 26 | 0.00 | Q9GZV9 | Fibroblast growth factor 23                       | *605380 |     |
| AGTR2   | 25 | 0.00 | P50052 | Type-2 angiotensin II receptor                    | *300034 |     |
| ARHGEF1 | 25 | 4.33 | Q92888 | Rho guanine nucleotide exchange factor 1          | *601855 |     |
| GRM2    | 25 | 0.14 | Q14416 | Metabotropic glutamate receptor 2                 | *604099 |     |
| GRM3    | 25 | 0.10 | Q14832 | Metabotropic glutamate receptor 3                 | *601115 |     |
| GRM4    | 25 | 0.01 | Q14833 | Metabotropic glutamate receptor 4                 | *604100 | 3   |
| GRM8    | 25 | 0.04 | O00222 | Metabotropic glutamate receptor 8                 | *601116 |     |

**Suppl. Table 7: Mouse/human homology of 60 orthologous genes and proteins with role in arterial thrombosis with or without bleeding (see Table 2).** Median homology on nucleotide level: 89.47 (IQR: 77.11-94.69), median pairwise alignment score on protein level: 91.80 (IQR: 81.35-95.40)

| Gene                                                | Protein                                                                        | Score Class I-III | Score class IV | Homology nucleotide (mouse - human) | Pairwise alignment score protein (mouse - human) |
|-----------------------------------------------------|--------------------------------------------------------------------------------|-------------------|----------------|-------------------------------------|--------------------------------------------------|
| <b><i>Antithrombotic, no prolonged bleeding</i></b> |                                                                                |                   |                |                                     |                                                  |
| F11                                                 | Coagulation factor XI                                                          | -1                | 0              | 78.04                               | 78.30                                            |
| F12                                                 | Coagulation factor XII                                                         | -2                | 0              | 71.69                               | 72.60                                            |
| SERPINE1                                            | Plasminogen activator inhibitor 1                                              | -1                | 0              | 79.10                               | 79.10                                            |
| DUSP3                                               | Dual specificity protein phosphatase 3                                         | -2                | 0              | 92.97                               | 93.50                                            |
| GP6                                                 | Platelet glycoprotein VI                                                       | -2                | 0              | 60.06                               | 69.60                                            |
| ITGA6                                               | Integrin alpha-6                                                               | -2                | 0              | 93.13                               | 93.10                                            |
| P2RX1                                               | P2X purinoceptor 1                                                             | -2                | 0              | 89.47                               | 89.50                                            |
| SELP                                                | P-selectin                                                                     | -1                | 0              | 72.79                               | 68.90                                            |
| CSNK2B                                              | Casein kinase II subunit beta                                                  | -2                | 0              | 54.09                               | 100.00                                           |
| PIK3C3                                              | Phosphatidylinositol 3-kinase catalytic subunit type 3                         | -2                | 0              | 97.97                               | 98.00                                            |
| PIK3CG                                              | Phosphatidylinositol 4,5-bisphosphate 3-kinase catalytic subunit gamma isoform | -2                | 0              | 94.10                               | 94.10                                            |
| PLD1                                                | Phospholipase D1                                                               | -1                | 0              | 91.31                               | 91.30                                            |
| PPIA                                                | Peptidyl-prolyl cis-trans isomerase A                                          | -2                | 0              | n.a.                                | 96.30                                            |
| PRKCA                                               | Protein kinase C alpha type                                                    | -2                | 0              | 99.40                               | 99.60                                            |
| RHOG                                                | Rho-related GTP-binding protein RhoG                                           | -1                | 0              | 100.00                              | 100.00                                           |
| S100A9                                              | Protein S100-A9                                                                | -2                | 0              | 56.64                               | 60.40                                            |
| SGK1                                                | Serine/threonine-protein kinase Sgk1                                           | -2                | 0              | 94.47                               | 94.50                                            |
| <b><i>Antithrombotic, prolonged bleeding</i></b>    |                                                                                |                   |                |                                     |                                                  |
| F2                                                  | Prothrombin                                                                    | -2                | -1             | 81.72                               | 82.00                                            |
| F8                                                  | Coagulation factor VIII                                                        | -2                | -2             | 73.65                               | 74.20                                            |
| F9                                                  | Coagulation factor IX                                                          | -2                | -2             | 80.25                               | 82.00                                            |
| KLKB1                                               | Plasma kallikrein                                                              | -1                | -1             | 76.18                               | 76.20                                            |
| VWF                                                 | Von Willebrand factor                                                          | -2                | -2             | 83.36                               | n.d.                                             |
| ANO6                                                | Anoctamin-6                                                                    | -2                | -1             | 90.34                               | 89.90                                            |
| CLEC1B                                              | C-type lectin domain family 1 member B                                         | -1                | -1             | 63.76                               | 64.60                                            |
| F2RL3                                               | Proteinase-activated receptor 4                                                | -1                | -2             | 74.49                               | 78.30                                            |
| FCER1G                                              | High affinity immunoglobulin epsilon receptor subunit gamma                    | -2                | -1             | 88.37                               | 89.60                                            |
| FERMT3                                              | Fermitin family homolog 3                                                      | -2                | -2             | 93.53                               | 93.70                                            |

|                                                      |                                                                               |    |    |       |        |
|------------------------------------------------------|-------------------------------------------------------------------------------|----|----|-------|--------|
| GNA13                                                | Guanine nucleotide-binding protein subunit alpha-13                           | -2 | -2 | 96.82 | 96.80  |
| GNAQ                                                 | Guanine nucleotide-binding protein G(q) subunit alpha                         | -1 | -2 | 99.72 | 99.70  |
| GPIBA                                                | Platelet glycoprotein Ib alpha chain                                          | -2 | -2 | 52.45 | 63.70  |
| GPIBB                                                | Platelet glycoprotein Ib beta chain                                           | -1 | -2 | 84.11 | 93.20  |
| ITGA2                                                | Integrin alpha-2                                                              | -1 | -1 | 82.51 | 82.50  |
| ITGB3                                                | Integrin beta-3                                                               | -2 | -2 | 90.72 | 90.70  |
| MERTK                                                | Tyrosine-protein kinase Mer                                                   | -1 | -1 | 81.39 | 81.90  |
| ORA1                                                 | Calcium release-activated calcium channel protein 1                           | -1 | -1 | 71.05 | 91.70  |
| P2RY1                                                | P2Y purinoceptor 1                                                            | -1 | -2 | 94.91 | 94.90  |
| P2RY12                                               | P2Y purinoceptor 12                                                           | -2 | -2 | 85.88 | 89.00  |
| PDIA3                                                | Protein disulfide-isomerase A3                                                | -2 | -1 | 93.07 | 93.10  |
| PDIA4                                                | Protein disulfide-isomerase A4                                                | -2 | -1 | 88.46 | 88.30  |
| PTPRJ                                                | Receptor-type tyrosine-protein phosphatase eta                                | -1 | -1 | 66.44 | 72.70  |
| STIM1                                                | Stromal interaction molecule 1                                                | -1 | -1 | 96.79 | 96.80  |
| TRPM7                                                | Transient receptor potential cation channel subfamily M member 7              | -2 | -1 | 94.36 | 94.40  |
| TSPAN32                                              | Tetraspanin-32                                                                | -2 | -1 | 63.28 | 64.00  |
| CSK                                                  | Tyrosine-protein kinase CSK                                                   | -1 | -2 | 99.11 | 99.10  |
| MAP3K5                                               | Mitogen-activated protein kinase kinase 5                                     | -2 | -2 | 94.42 | 94.90  |
| MAPK8                                                | Mitogen-activated protein kinase 8                                            | -2 | -1 | 99.06 | 97.60  |
| MAPK14                                               | Mitogen-activated protein kinase 14                                           | -1 | -1 | 99.44 | 99.40  |
| PDPK1                                                | 3-phosphoinositide-dependent protein kinase 1                                 | -1 | -1 | 94.28 | 95.10  |
| PIK3CB                                               | Phosphatidylinositol 4,5-bisphosphate 3-kinase catalytic subunit beta isoform | -1 | -1 | 95.86 | 95.90  |
| PLCG2                                                | 1-Phosphatidylinositol 4,5-bisphosphate phosphodiesterase gamma-2             | -2 | -2 | 94.15 | 94.20  |
| RAC1                                                 | Ras-related C3 botulinum toxin substrate 1                                    | -2 | -2 | 98.10 | 100.00 |
| RASGRP2                                              | RAS guanyl-releasing protein 2                                                | -2 | -2 | 96.38 | 96.40  |
| TLN1                                                 | Talin-1                                                                       | -2 | -2 | 98.74 | 98.70  |
| NBEAL2                                               | Neurobeachin-like protein 2                                                   | -2 | -2 | 88.22 | 88.40  |
| KCNIP3                                               | Calsenilin                                                                    | -2 | -1 | 72.54 | 91.80  |
| MMP2                                                 | 72 kDa type IV collagenase                                                    | -1 | -2 | 95.62 | 95.90  |
| BAMBI                                                | BMP and activin membrane-bound inhibitor homolog                              | -1 | -1 | 93.08 | 93.10  |
| BDKRB2                                               | B2 bradykinin receptor                                                        | -2 | -2 | 79.85 | 80.80  |
| MFAP2                                                | Microfibrillar-associated protein 2                                           | -1 | -1 | 87.57 | 90.60  |
| <b><i>Not antithrombotic, prolonged bleeding</i></b> |                                                                               |    |    |       |        |
| CEACAM1                                              | Carcinoembryonic antigen-related cell adhesion molecule 1                     | 2  | -1 | 57.39 | 58.00  |
